# Supplementary material
Source: MDPI journal article supplement (https://www.mdpi.com/2227-9040/10/1/21)
Supplement: s1 [file s1 › chemosensors-1507206-supplementary.pdf]

## SUPPORTING INFORMATION

### Spectroscopic and Computational Study of the Protonation Equilibria of Amino-Substituted benzo[*b*]thieno[2,3-*b*]pyrido[1,2-*a*]benzimidazoles as Novel pH-Sensing Materials

Nataša Perin, Darko Babić, Petar Kassal, Ana Čikoš, Marijana Hranjec\* and Robert Vianello\*

#### TABLE OF CONTENTS

| CONTENT                                                                                                                                                | PAGE    |
|--------------------------------------------------------------------------------------------------------------------------------------------------------|---------|
| <b>Figure S1:</b> Emission spectra of <b>5</b> and <b>6</b> at different pH values, and the ratiometric fluorescence pH titration curve for <b>6</b> . | S2      |
| <b>Figures S2–S11:</b> <sup>1</sup> H and <sup>13</sup> C NMR spectra for <b>5</b> at different pH values.                                             | S3–S12  |
| <b>Figures S12–S15:</b> Comparison of experimental and calculated absorption spectra.                                                                  | S13–S16 |
| <b>Figures S16–S25:</b> Changes in natural transition orbitals and geometries during calculated excitations.                                           | S17–S27 |

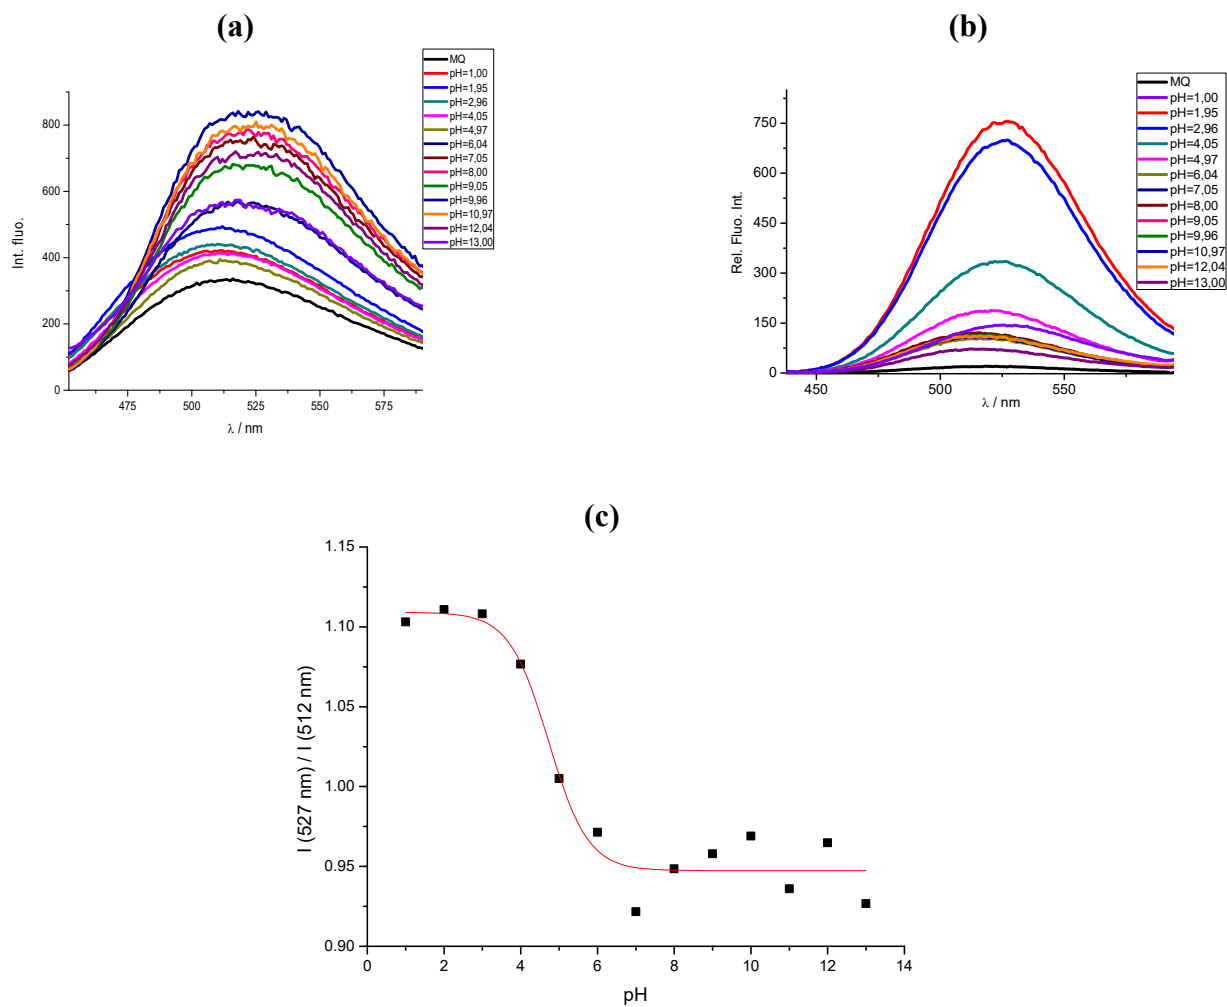

**Figure S1.** Emission spectra of **5** (a) and **6** (b) at different pH values in buffer ( $\lambda_{\text{exc}} = 310\text{nm}$  for **5**,  $\lambda_{\text{exc}} = 308\text{ nm}$  for **6**). (c) Ratiometric fluorescence pH titration curve for **6** from which its  $pK_a$  value was obtained.

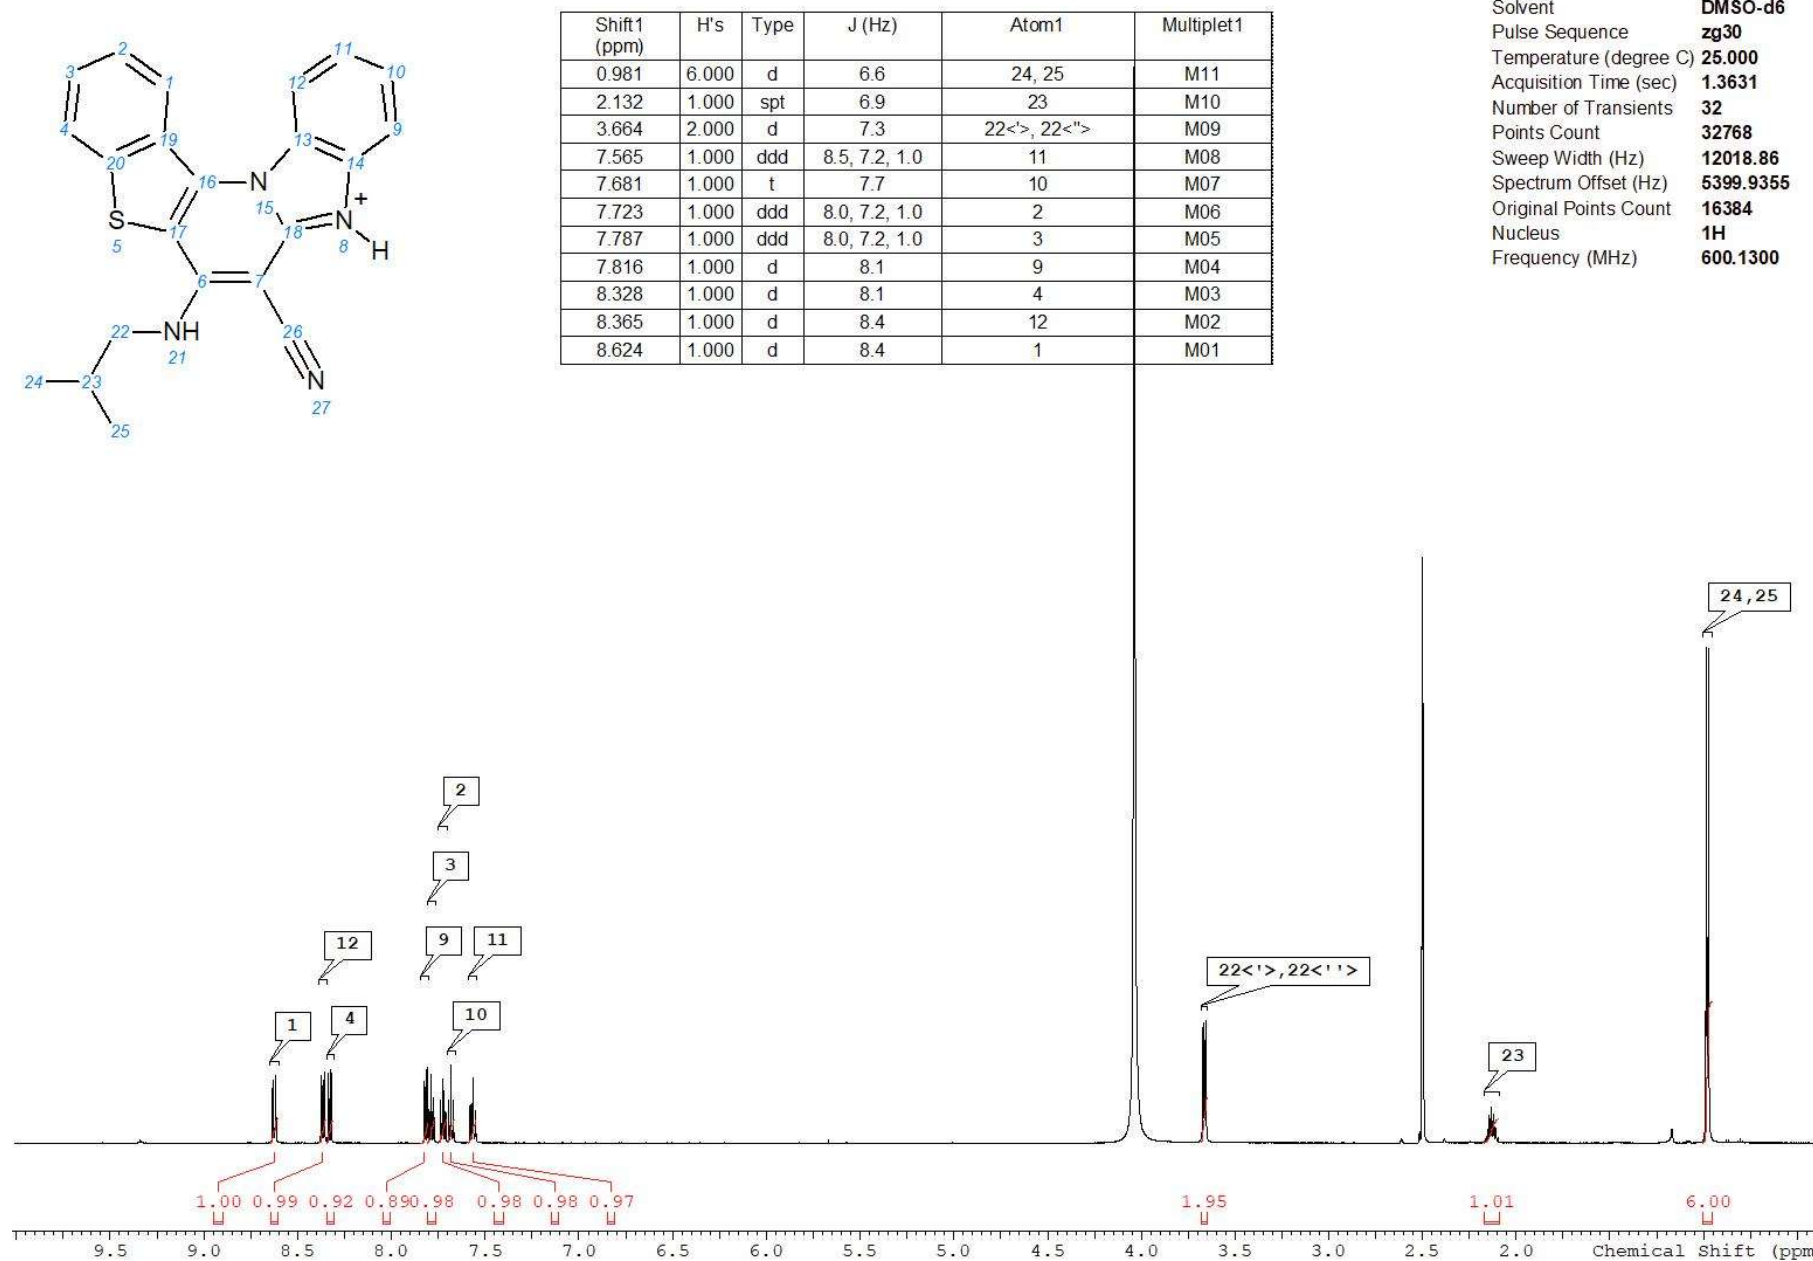

**Figure S2.** <sup>1</sup>H spectrum of **5** in 90% DMSO-d<sub>6</sub> / 10% D<sub>2</sub>O at 25 °C, pH 2.4

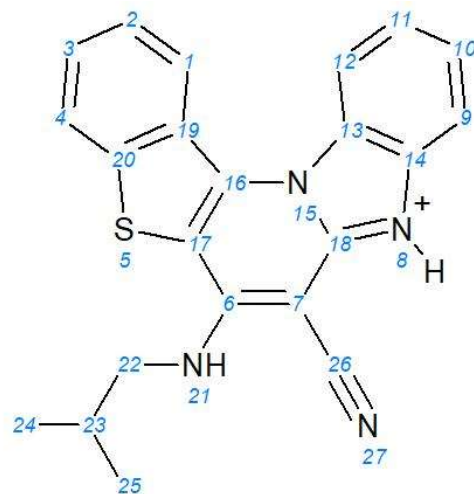

| Atom | Exp. Shift (ppm) | Atom | Exp. Shift (ppm) |
|------|------------------|------|------------------|
| 24   | 19.67            | 3    | 129.95           |
| 25   | 19.67            | 14   | 132.40           |
| 23   | 28.99            | 16   | 133.23           |
| 22   | 51.17            | 20   | 139.70           |
| 7    | 68.55            | 18   | 148.52           |
| 9    | 113.90           | 6    | 150.71           |
| 17   | 115.09           |      |                  |
| 12   | 115.97           |      |                  |
| 26   | 120.70           |      |                  |
| 11   | 123.80           |      |                  |
| 4    | 124.68           |      |                  |
| 1    | 125.10           |      |                  |
| 2    | 126.27           |      |                  |
| 10   | 127.78           |      |                  |
| 19   | 128.45           |      |                  |
| 13   | 128.47           |      |                  |

Solvent **DMSO-d<sub>6</sub>**  
 Pulse Sequence **deptqgsp.2**  
 Temperature (degree C) **25.000**  
 Acquisition Time (sec) **0.5999**  
 Number of Transients **8192**  
 Points Count **32768**  
 Sweep Width (Hz) **39368.88**  
 Spectrum Offset (Hz) **15083.2031**  
 Original Points Count **23619**  
 Nucleus **<sup>13</sup>C**  
 Frequency (MHz) **150.9029**

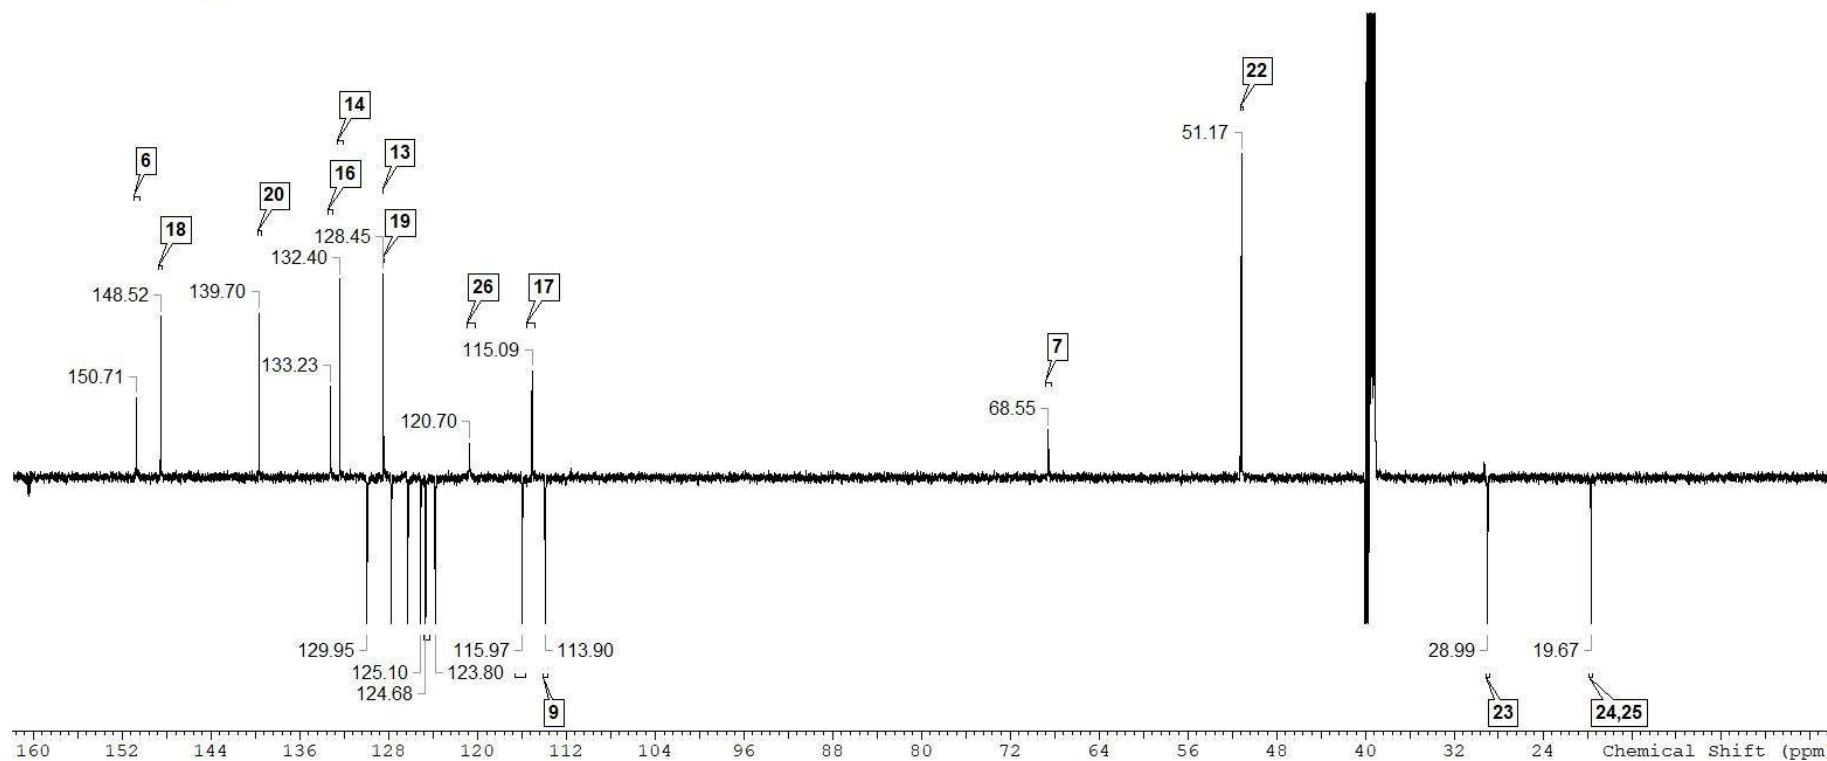

**Figure S3.** <sup>13</sup>C spectrum of **5** in 90% DMSO-d<sub>6</sub> / 10% D<sub>2</sub>O at 25 °C, pH 2.4

540 ul DMSO + 60 ul 1 M DCl in D2O  
pD 2.0, pH 2.4

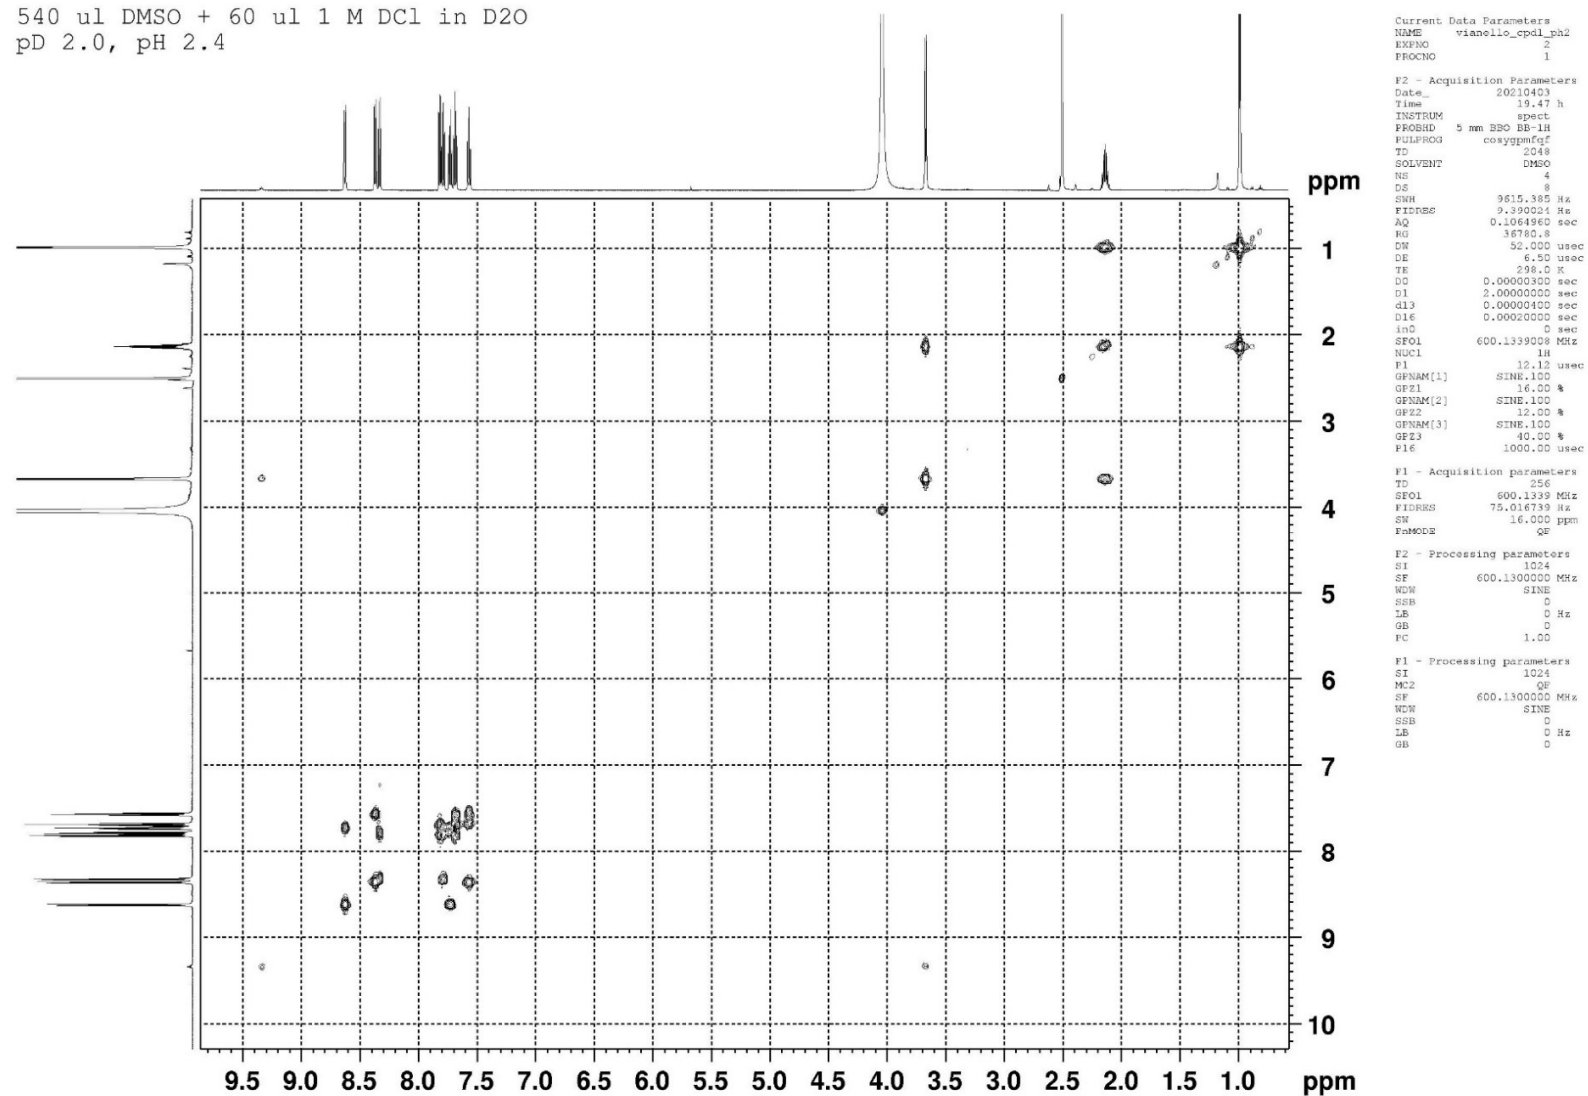

Figure S4. COSY spectrum **5** in 90% DMSO-d<sub>6</sub> / 10% D<sub>2</sub>O at 25 °C, pH 2.4

540 ul DMSO + 60 ul 1 M DCl in D<sub>2</sub>O  
pD 2.0, pH 2.4

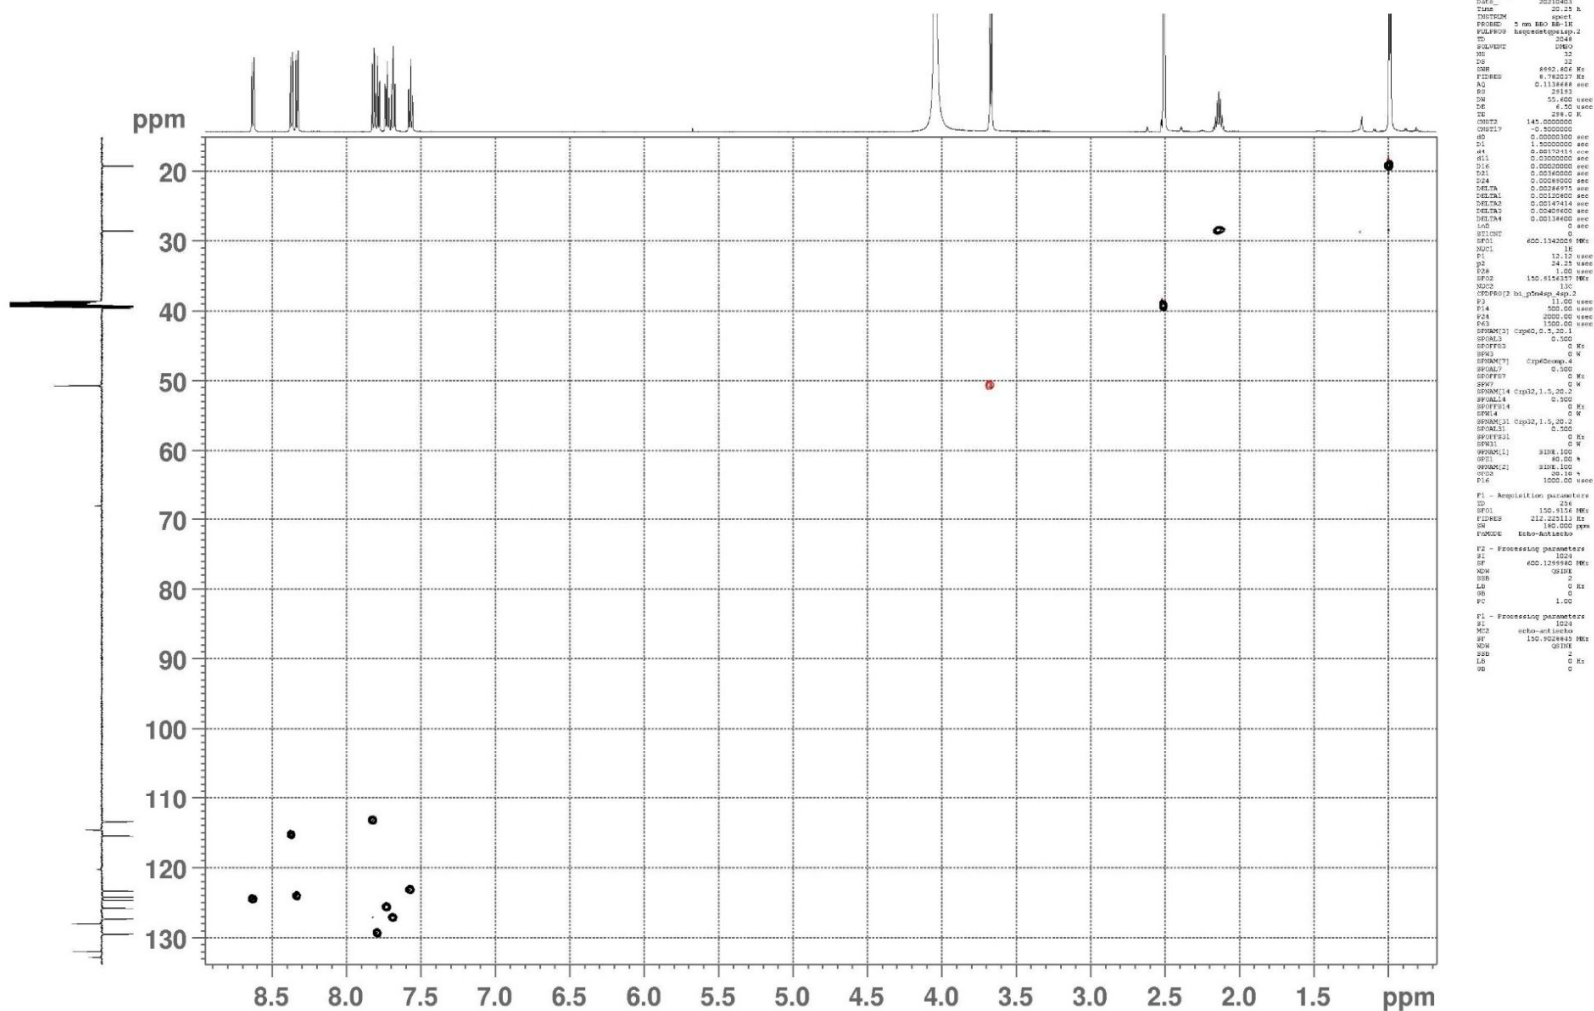

Figure S5. <sup>1</sup>H-<sup>13</sup>C HSQC spectrum of **5** in 90% DMSO-d<sub>6</sub> / 10% D<sub>2</sub>O at 25 °C, pH 2.4

540 ul DMSO + 60 ul 1 M DCl in D2O  
pD 2.0, pH 2.4

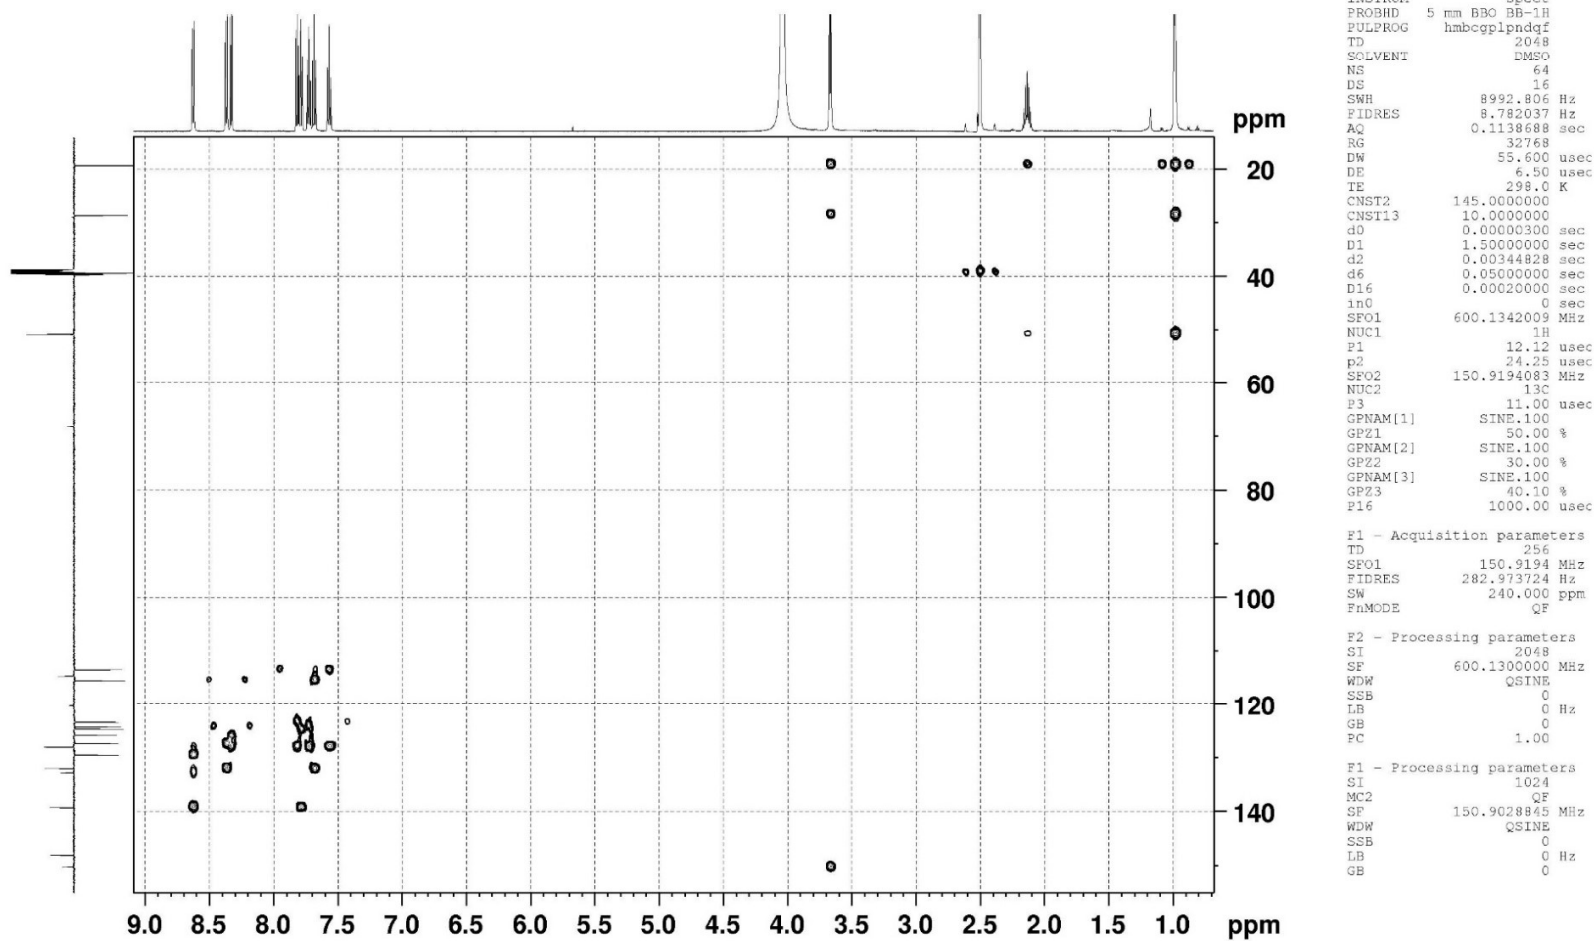

**Figure S6.**  $^1\text{H}$ - $^{13}\text{C}$  HMBC spectrum of **5** in 90% DMSO- $\text{d}_6$  / 10%  $\text{D}_2\text{O}$  at 25  $^\circ\text{C}$ , pH 2.4

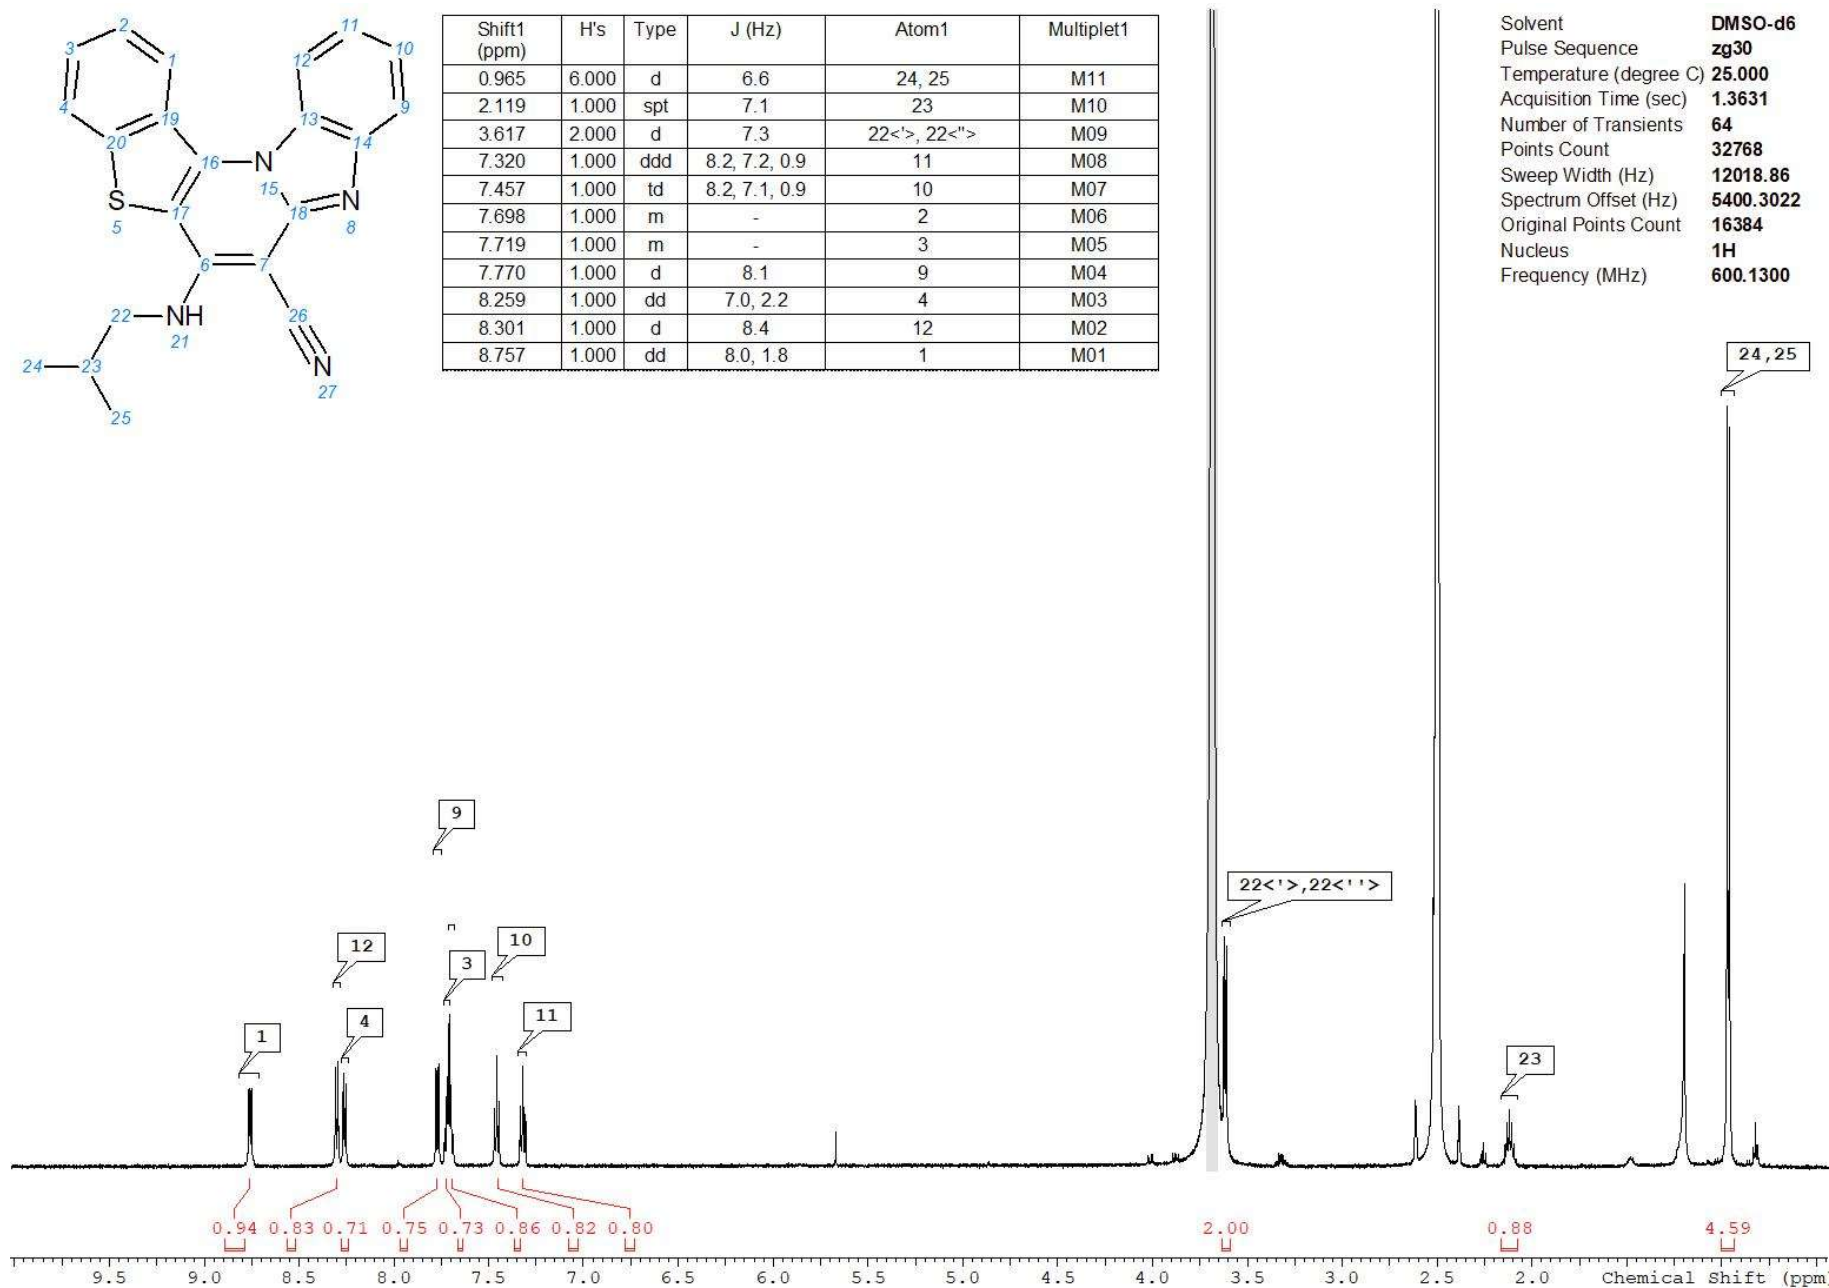

**Figure S7.** <sup>1</sup>H spectrum of **5** in 90% DMSO-d<sub>6</sub> / 10% D<sub>2</sub>O at 25 °C, pH 7.5

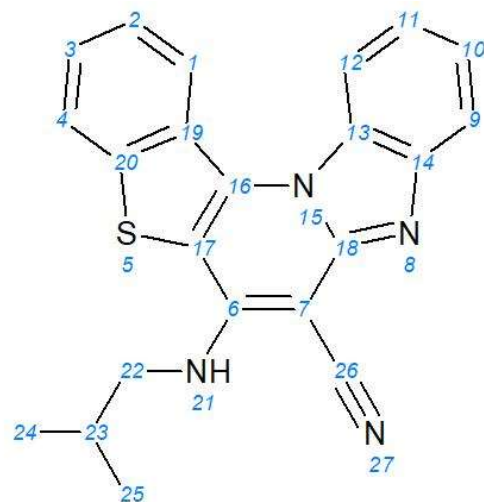

| Atom | Exp. Shift (ppm) | Atom | Exp. Shift (ppm) |
|------|------------------|------|------------------|
| 24   | 19.71            | 13   | 130.41           |
| 25   | 19.71            | 16   | 133.50           |
| 23   | 28.73            | 20   | 138.87           |
| 22   | 50.94            | 14   | 144.86           |
| 7    | 71.75            | 6    | 148.67           |
| 12   | 114.51           | 18   | 151.53           |
| 17   | 117.65           |      |                  |
| 26   | 117.89           |      |                  |
| 9    | 118.80           |      |                  |
| 11   | 120.22           |      |                  |
| 4    | 124.47           |      |                  |
| 1    | 124.63           |      |                  |
| 10   | 124.95           |      |                  |
| 2    | 125.72           |      |                  |
| 3    | 128.75           |      |                  |
| 19   | 129.23           |      |                  |

Solvent **DMSO-d<sub>6</sub>**  
 Pulse Sequence **deptqgsp.2**  
 Temperature (degree C) **25.000**  
 Acquisition Time (sec) **0.5999**  
 Number of Transients **22300**  
 Points Count **32768**  
 Sweep Width (Hz) **39368.88**  
 Spectrum Offset (Hz) **15082.0010**  
 Original Points Count **23619**  
 Nucleus **<sup>13</sup>C**  
 Frequency (MHz) **150.9029**

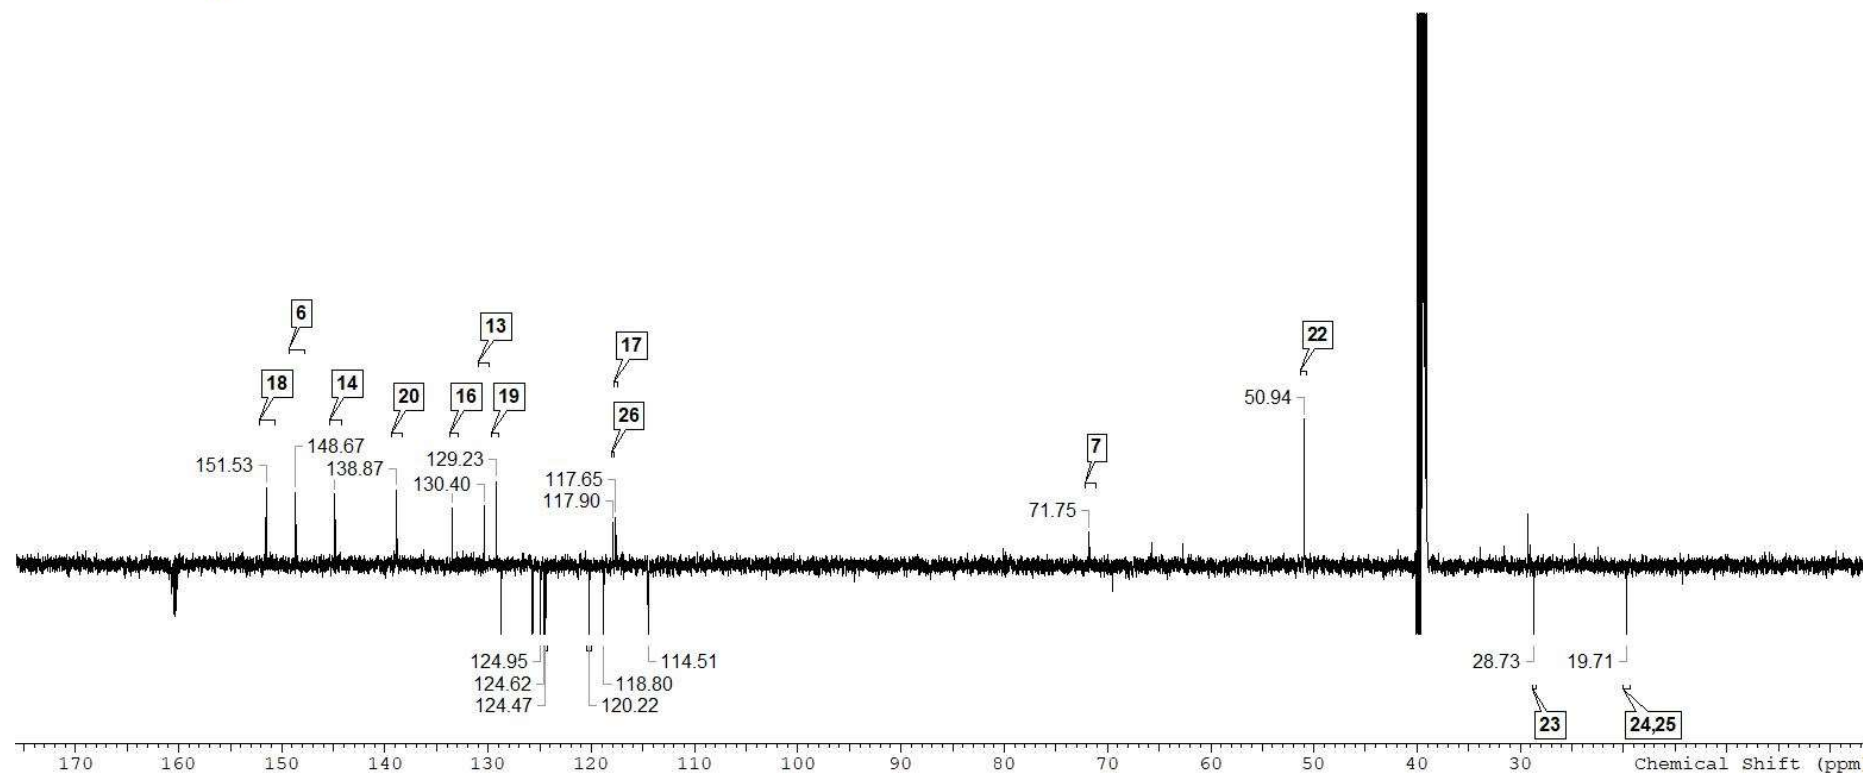

**Figure S8.** <sup>13</sup>C spectrum of **5** in 90% DMSO-d<sub>6</sub> / 10% D<sub>2</sub>O at 25 °C, pH 7.5

540  $\mu$ l DMSO + 60  $\mu$ l D<sub>2</sub>O  
pD 7.1, pH 7.5

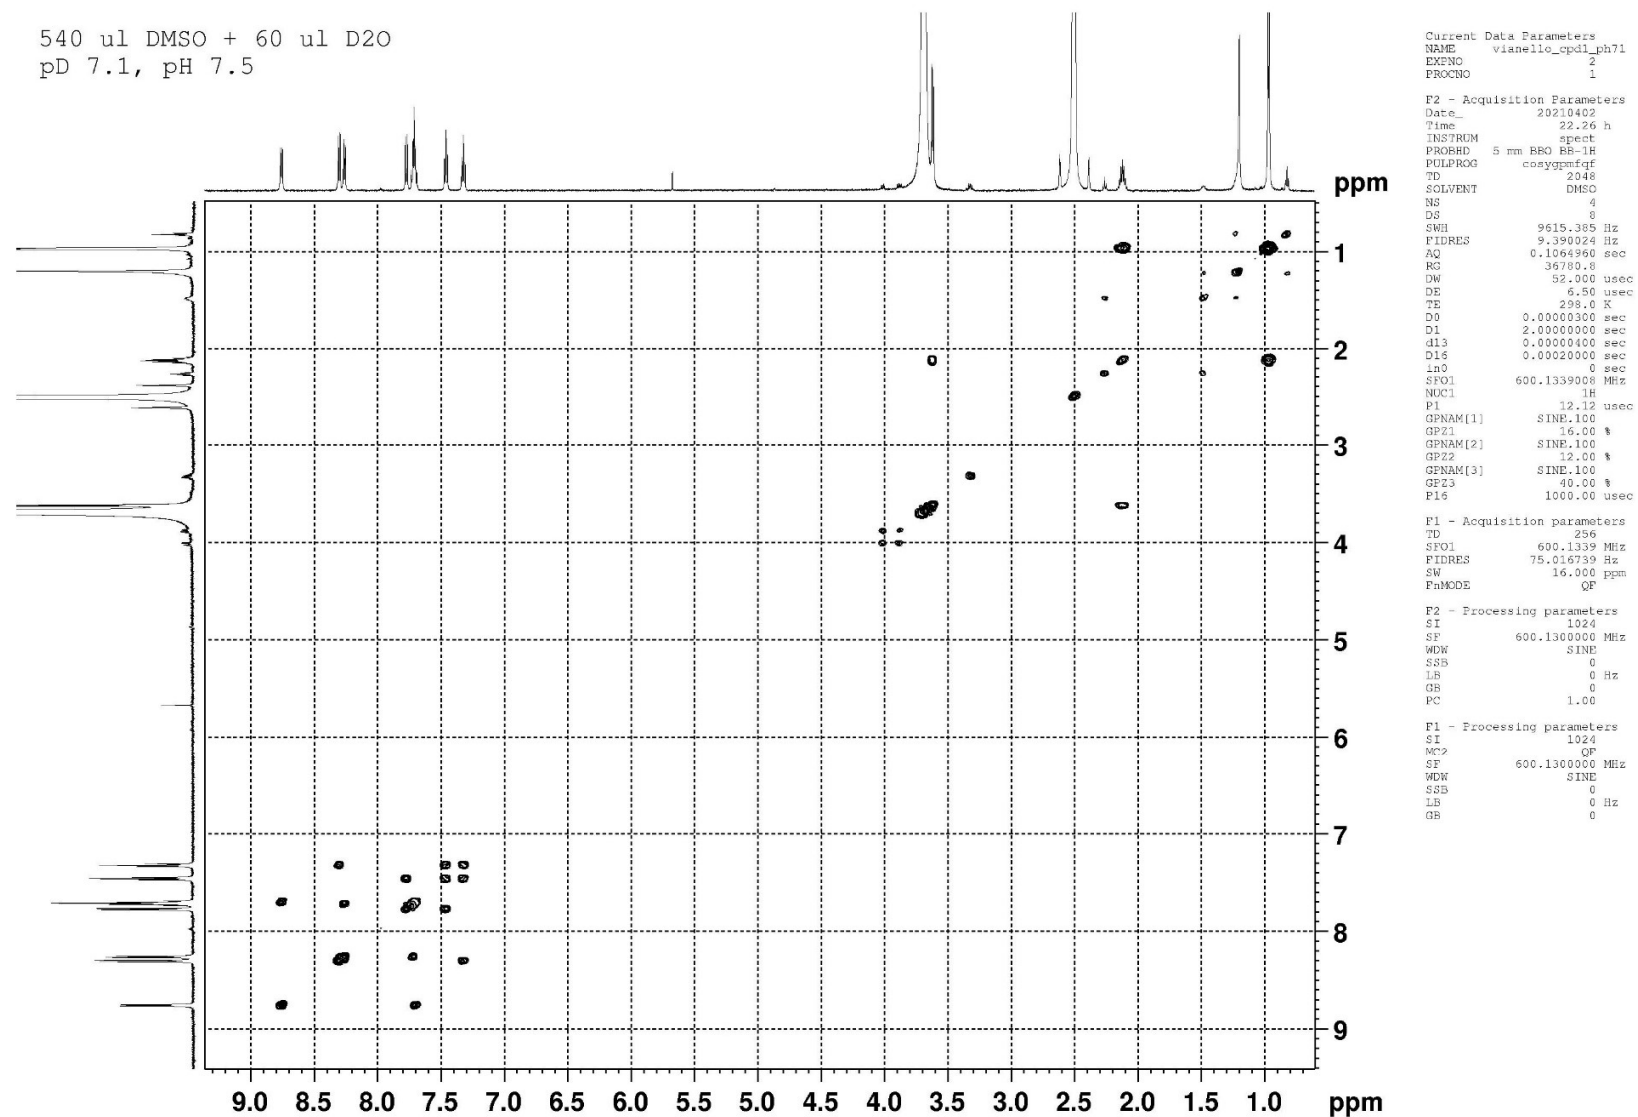

**Figure S9.** COSY spectrum of **5** in 90% DMSO- $d_6$  / 10% D<sub>2</sub>O at 25 °C, pH 7.5

```

DURANT DATA
NAME      vlasenko@upei.ca
MAIL      vlasenko@upei.ca
PROJECT   1

F2 - Acquisition Parameters
=====
DATE      2012-05-08
TIME      21:04:18
PROB      1
PROC      5 was 80 Hz 1000
F2 - Acquisition Parameters
=====
F2FREQ    144.000000 MHz
F2P1      20.48
F2P2      20.48
F2P3      20.48
F2P4      20.48
F2P5      20.48
F2P6      20.48
F2P7      20.48
F2P8      20.48
F2P9      20.48
F2P10     20.48
F2P11     20.48
F2P12     20.48
F2P13     20.48
F2P14     20.48
F2P15     20.48
F2P16     20.48
F2P17     20.48
F2P18     20.48
F2P19     20.48
F2P20     20.48
F2P21     20.48
F2P22     20.48
F2P23     20.48
F2P24     20.48
F2P25     20.48
F2P26     20.48
F2P27     20.48
F2P28     20.48
F2P29     20.48
F2P30     20.48
F2P31     20.48
F2P32     20.48
F2P33     20.48
F2P34     20.48
F2P35     20.48
F2P36     20.48
F2P37     20.48
F2P38     20.48
F2P39     20.48
F2P40     20.48
F2P41     20.48
F2P42     20.48
F2P43     20.48
F2P44     20.48
F2P45     20.48
F2P46     20.48
F2P47     20.48
F2P48     20.48
F2P49     20.48
F2P50     20.48
F2P51     20.48
F2P52     20.48
F2P53     20.48
F2P54     20.48
F2P55     20.48
F2P56     20.48
F2P57     20.48
F2P58     20.48
F2P59     20.48
F2P60     20.48
F2P61     20.48
F2P62     20.48
F2P63     20.48
F2P64     20.48
F2P65     20.48
F2P66     20.48
F2P67     20.48
F2P68     20.48
F2P69     20.48
F2P70     20.48
F2P71     20.48
F2P72     20.48
F2P73     20.48
F2P74     20.48
F2P75     20.48
F2P76     20.48
F2P77     20.48
F2P78     20.48
F2P79     20.48
F2P80     20.48
F2P81     20.48
F2P82     20.48
F2P83     20.48
F2P84     20.48
F2P85     20.48
F2P86     20.48
F2P87     20.48
F2P88     20.48
F2P89     20.48
F2P90     20.48
F2P91     20.48
F2P92     20.48
F2P93     20.48
F2P94     20.48
F2P95     20.48
F2P96     20.48
F2P97     20.48
F2P98     20.48
F2P99     20.48
F2P100    20.48
F2P101    20.48
F2P102    20.48
F2P103    20.48
F2P104    20.48
F2P105    20.48
F2P106    20.48
F2P107    20.48
F2P108    20.48
F2P109    20.48
F2P110    20.48
F2P111    20.48
F2P112    20.48
F2P113    20.48
F2P114    20.48
F2P115    20.48
F2P116    20.48
F2P117    20.48
F2P118    20.48
F2P119    20.48
F2P120    20.48
F2P121    20.48
F2P122    20.48
F2P123    20.48
F2P124    20.48
F2P125    20.48
F2P126    20.48
F2P127    20.48
F2P128    20.48
F2P129    20.48
F2P130    20.48
F2P131    20.48
F2P132    20.48
F2P133    20.48
F2P134    20.48
F2P135    20.48
F2P136    20.48
F2P137    20.48
F2P138    20.48
F2P139    20.48
F2P140    20.48
F2P141    20.48
F2P142    20.48
F2P143    20.48
F2P144    20.48
F2P145    20.48
F2P146    20.48
F2P147    20.48
F2P148    20.48
F2P149    20.48
F2P150    20.48
F2P151    20.48
F2P152    20.48
F2P153    20.48
F2P154    20.48
F2P155    20.48
F2P156    20.48
F2P157    20.48
F2P158    20.48
F2P159    20.48
F2P160    20.48
F2P161    20.48
F2P162    20.48
F2P163    20.48
F2P164    20.48
F2P165    20.48
F2P166    20.48
F2P167    20.48
F2P168    20.48
F2P169    20.48
F2P170    20.48
F2P171    20.48
F2P172    20.48
F2P173    20.48
F2P174    20.48
F2P175    20.48
F2P176    20.48
F2P177    20.48
F2P178    20.48
F2P179    20.48
F2P180    20.48
F2P181    20.48
F2P182    20.48
F2P183    20.48
F2P184    20.48
F2P185    20.48
F2P186    20.48
F2P187    20.48
F2P188    20.48
F2P189    20.48
F2P190    20.48
F2P191    20.48
F2P192    20.48
F2P193    20.48
F2P194    20.48
F2P195    20.48
F2P196    20.48
F2P197    20.48
F2P198    20.48
F2P199    20.48
F2P200    20.48
F2P201    20.48
F2P202    20.48
F2P203    20.48
F2P204    20.48
F2P205    20.48
F2P206    20.48
F2P207    20.48
F2P208    20.48
F2P209    20.48
F2P210    20.48
F2P211    20.48
F2P212    20.48
F2P213    20.48
F2P214    20.48
F2P215    20.48
F2P216    20.48
F2P217    20.48
F2P218    20.48
F2P219    20.48
F2P220    20.48
F2P221    20.48
F2P222    20.48
F2P223    20.48
F2P224    20.48
F2P225    20.48
F2P226    20.48
F2P227    20.48
F2P228    20.48
F2P229    20.48
F2P230    20.48
F2P231    20.48
F2P232    20.48
F2P233    20.48
F2P234    20.48
F2P235    20.48
F2P236    20.48
F2P237    20.48
F2P238    20.48
F2P239    20.48
F2P240    20.48
F2P241    20.48
F2P242    20.48
F2P243    20.48
F2P244    20.48
F2P245    20.48
F2P246    20.48
F2P247    20.48
F2P248    20.48
F2P249    20.48
F2P250    20.48
F2P251    20.48
F2P252    20.48
F2P253    20.48
F2P254    20.48
F2P255    20.48
F2P256    20.48
F2P257    20.48
F2P258    20.48
F2P259    20.48
F2P260    20.48
F2P261    20.48
F2P262    20.48
F2P263    20.48
F2P264    20.48
F2P265    20.48
F2P266    20.48
F2P267    20.48
F2P268    20.48
F2P269    20.48
F2P270    20.48
F2P271    20.48
F2P272    20.48
F2P273    20.48
F2P274    20.48
F2P275    20.48
F2P276    20.48
F2P277    20.48
F2P278    20.48
F2P279    20.48
F2P280    20.48
F2P281    20.48
F2P282    20.48
F2P283    20.48
F2P284    20.48
F2P285    20.48
F2P286    20.48
F2P287    20.48
F2P288    20.48
F2P289    20.48
F2P290    20.48
F2P291    20.48
F2P292    20.48
F2P2
```

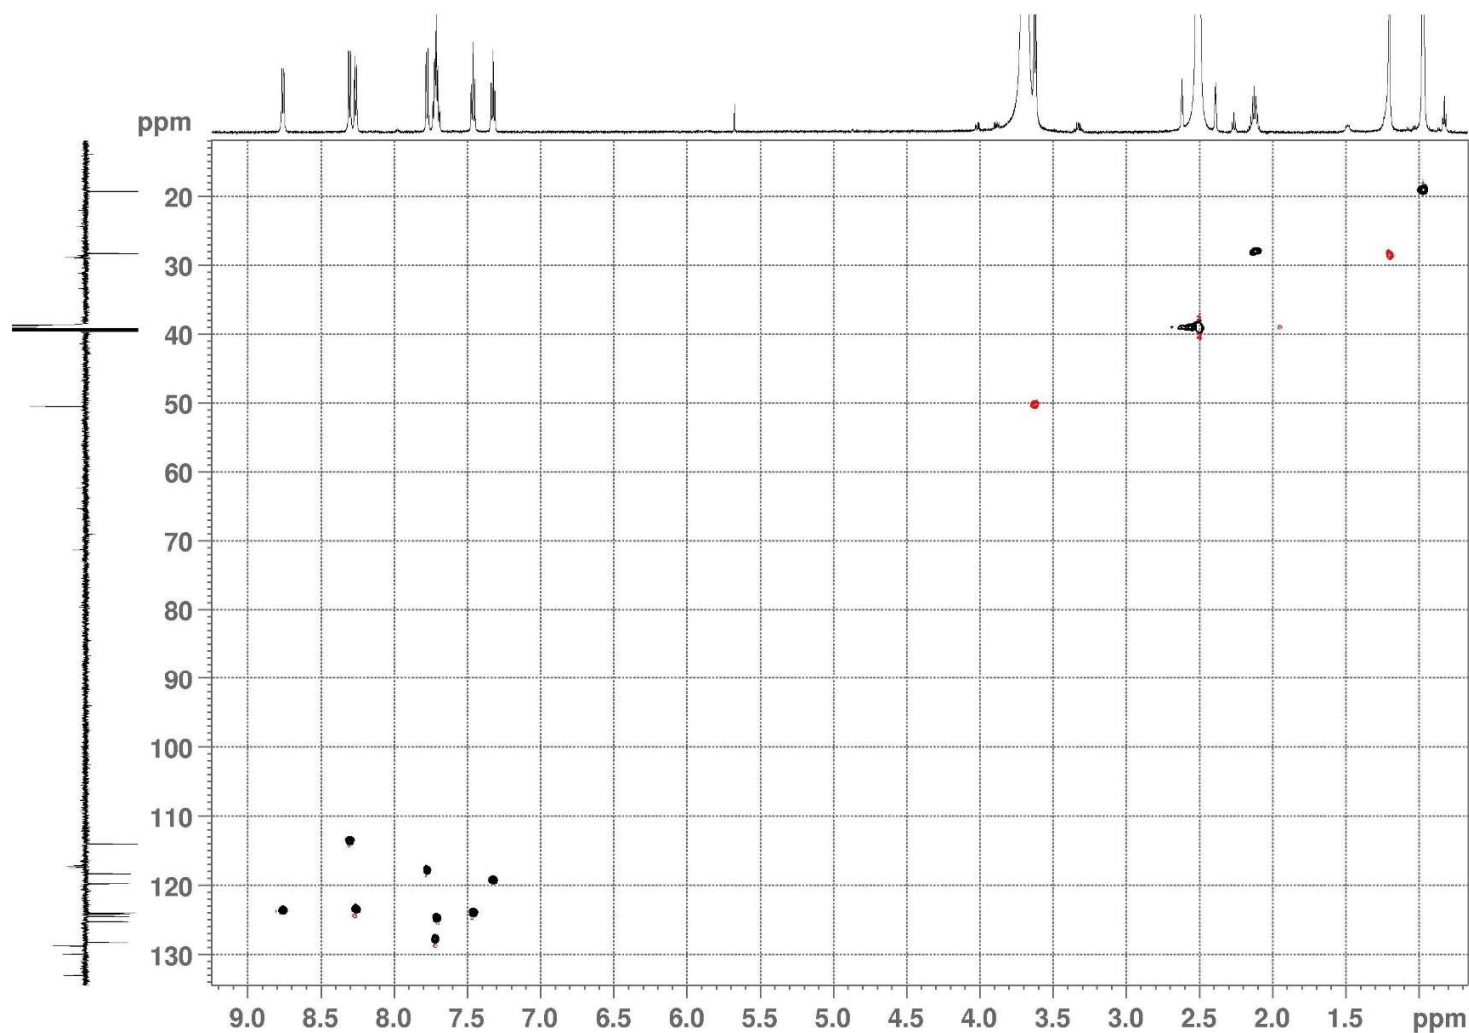

**Figure S10.**  $^1\text{H}$ - $^{13}\text{C}$  HSQC spectrum of **5** in 90% DMSO- $d_6$  / 10%  $\text{D}_2\text{O}$  at 25 °C, pH 7.5

540 ul DMSO + 60 ul D2O  
pD 7.1, pH 7.5

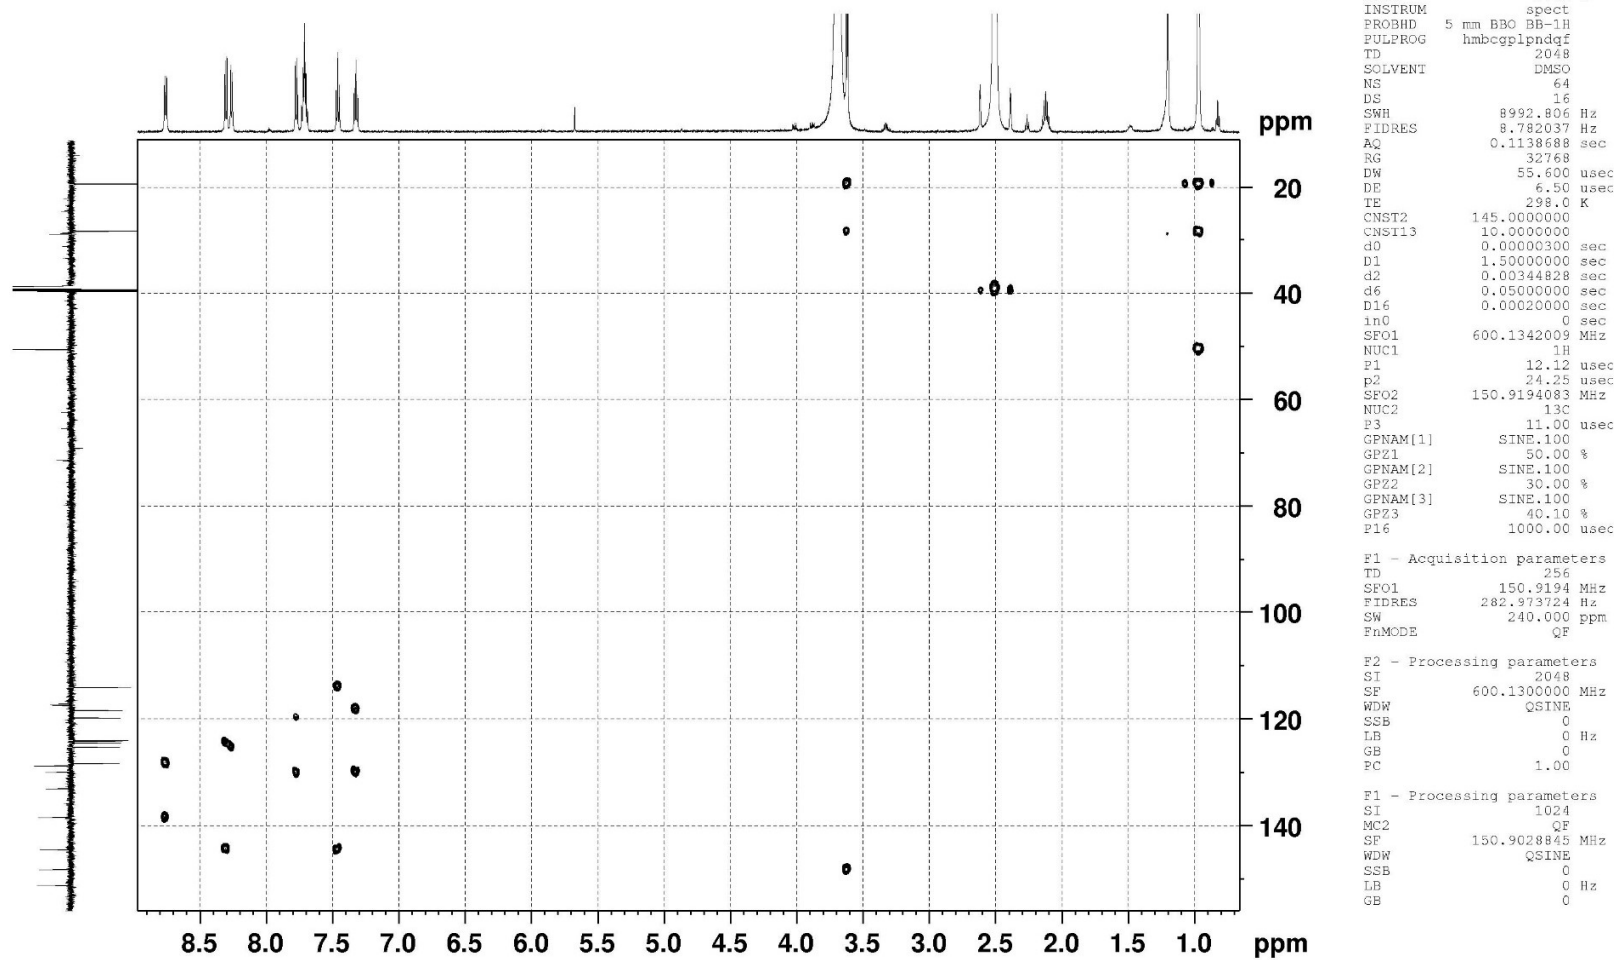

**Figure S11.**  $^1\text{H}$ - $^{13}\text{C}$  HMBC spectrum of **5** in 90% DMSO- $\text{d}_6$  / 10%  $\text{D}_2\text{O}$  at 25 °C, pH 7.5

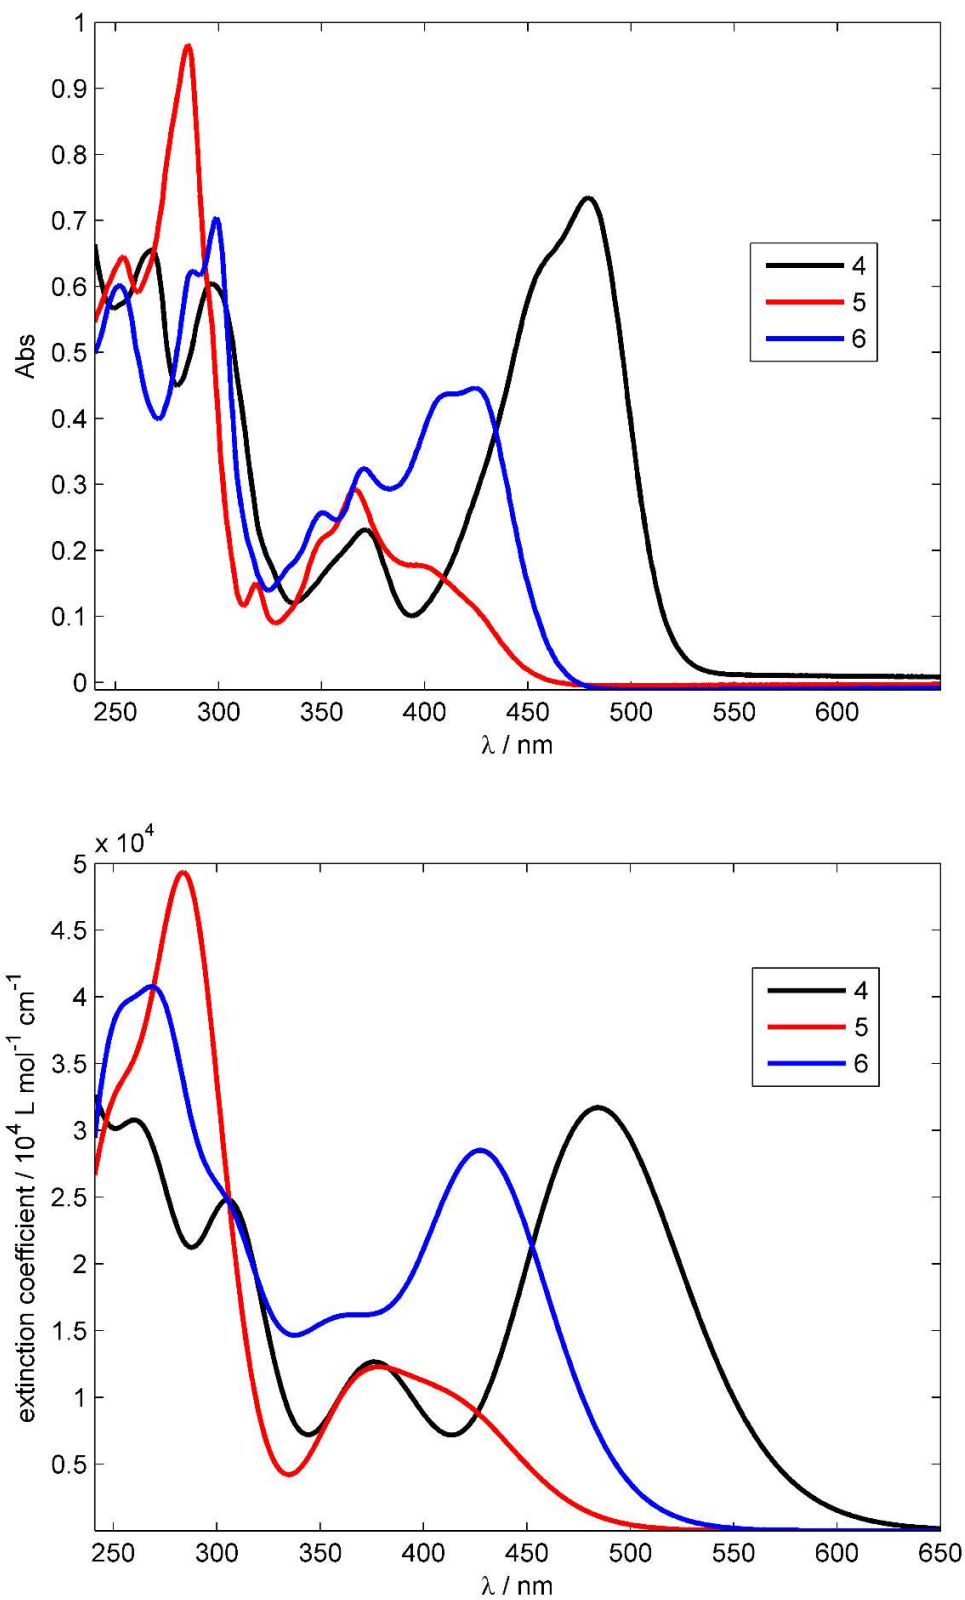

**Figure S12.** Comparison of experimental (top) and calculated (bottom) absorption spectra of systems 4–6.

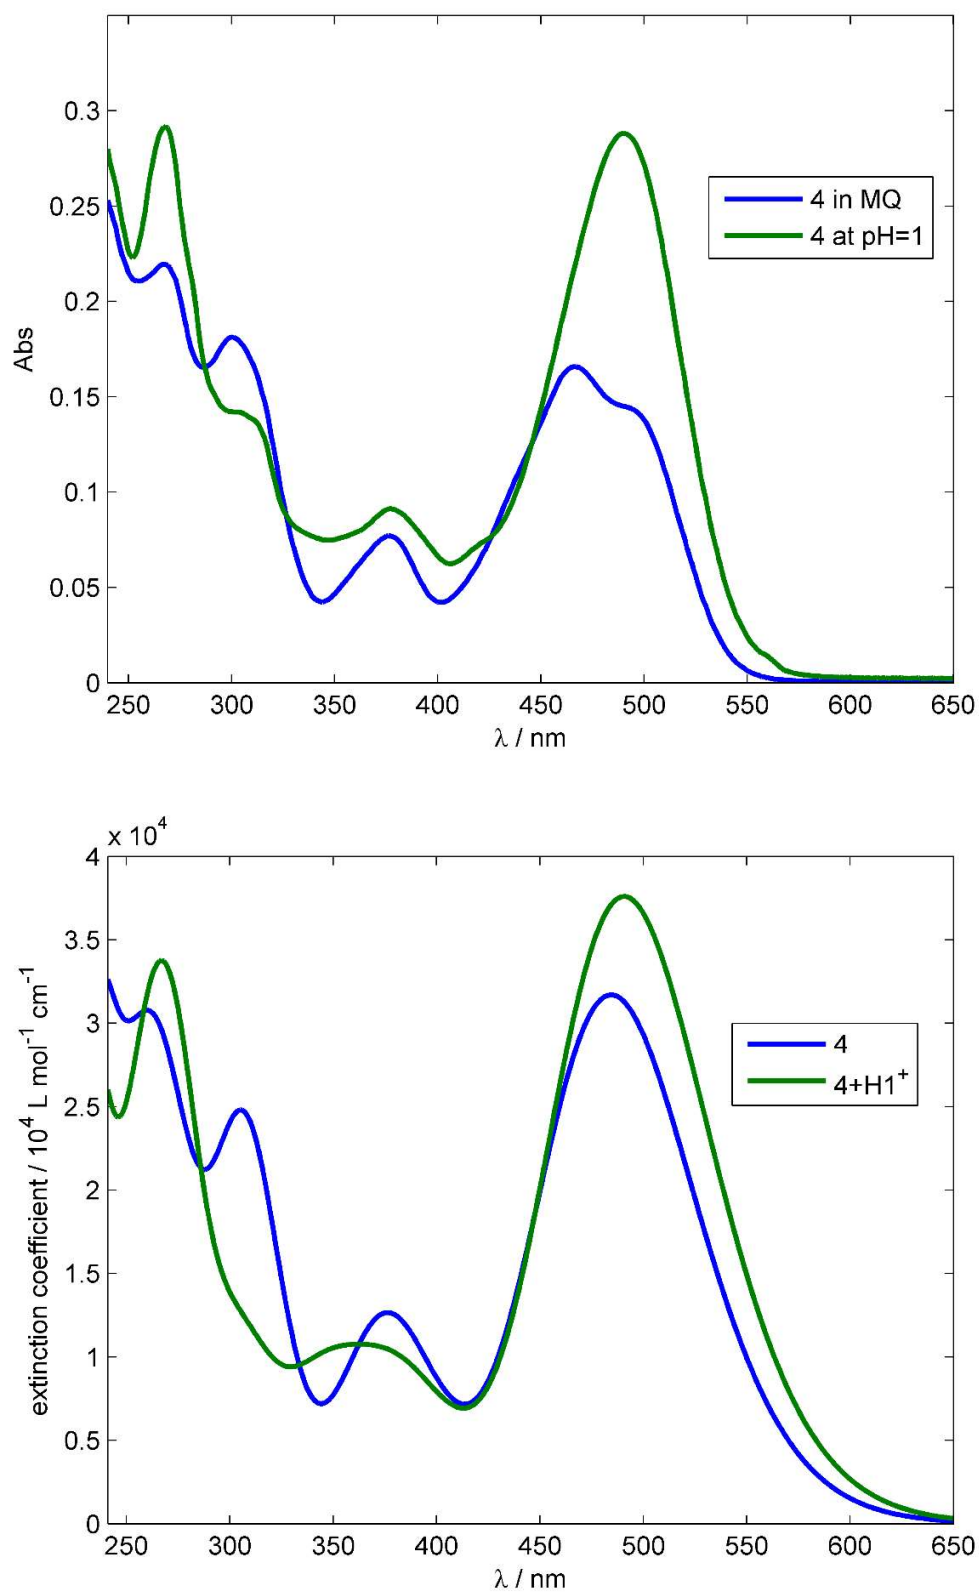

**Figure S13.** Comparison of the experimental absorption spectra of **4** in pure and acidified MQ (top) and those calculated for different protonation forms of **4** (bottom).

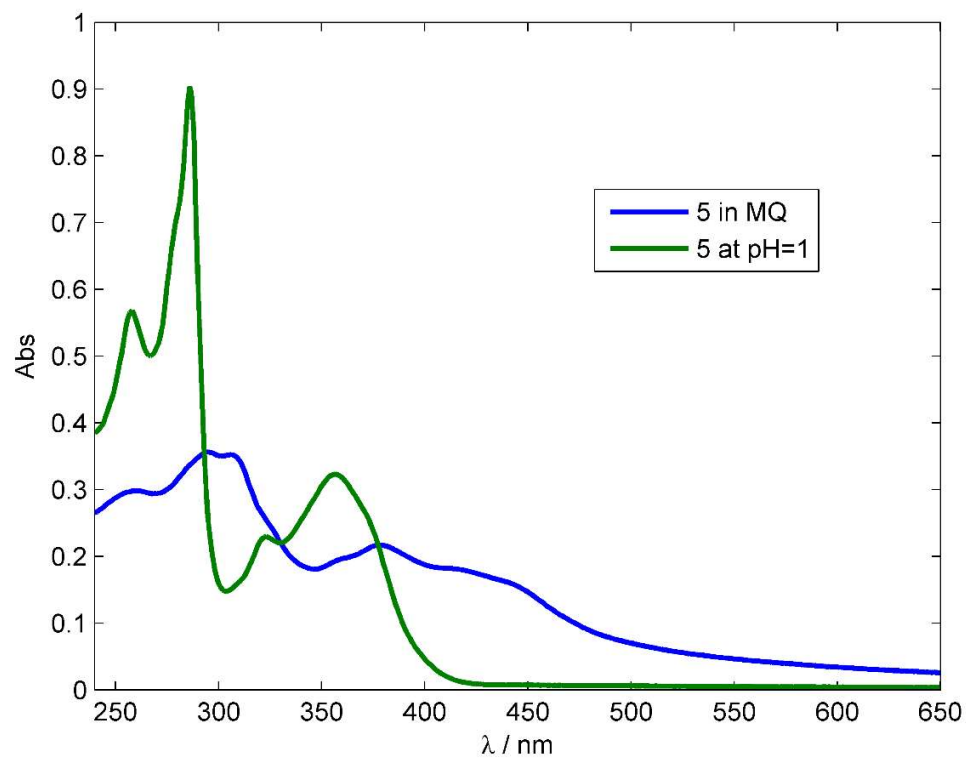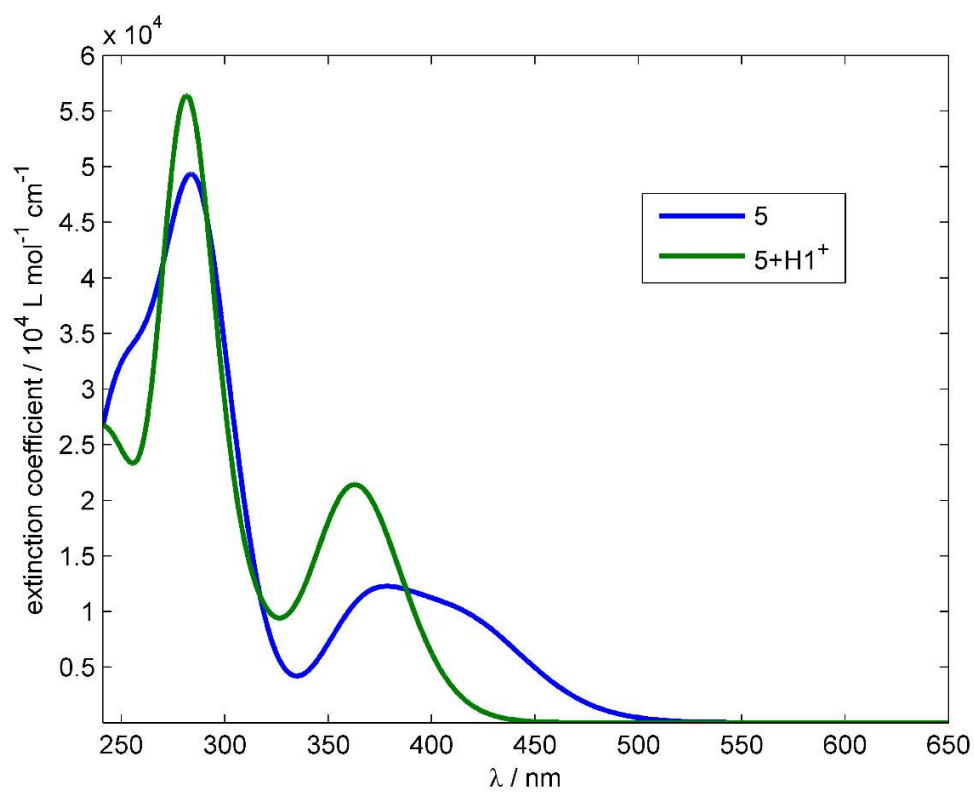

**Figure S14.** Comparison of the experimental absorption spectra of **5** in pure and acidified MQ (top) and those calculated for different protonation forms of **5** (bottom).

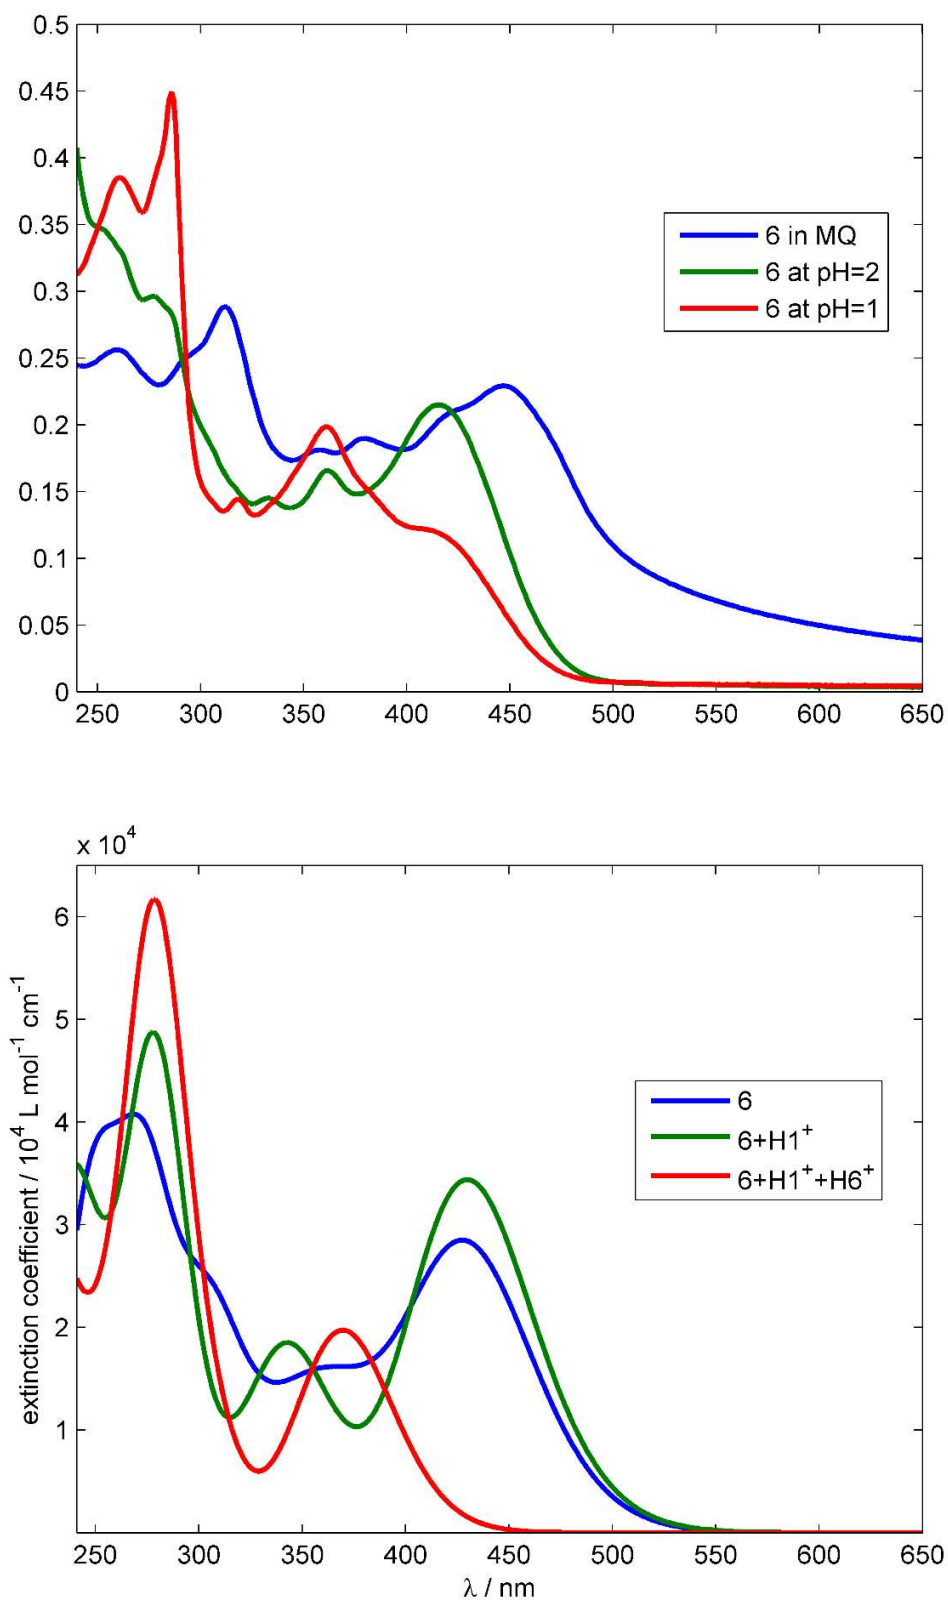

**Figure S15.** Comparison of the experimental absorption spectra of **6** in pure and acidified MQ (top) and those calculated for different protonation forms of **6** (bottom).

| Transition                                             | Occupied NTO(s)                                                                     | Unoccupied NTO(s)                                                                    |
|--------------------------------------------------------|-------------------------------------------------------------------------------------|--------------------------------------------------------------------------------------|
| 1<br>$\lambda = 484.54$ nm<br>$f = 0.5533$<br><br>100% | 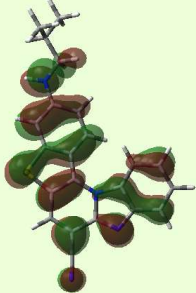   | 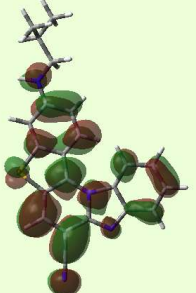   |
| 2<br>$\lambda = 378.66$ nm<br>$f = 0.1618$<br><br>98%  | 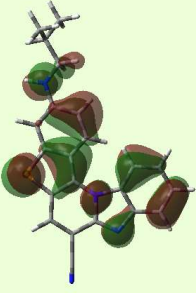   | 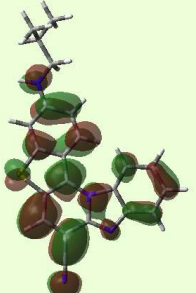   |
| 3<br>$\lambda = 370.48$ nm<br>$f = 0.0601$<br><br>94%  | 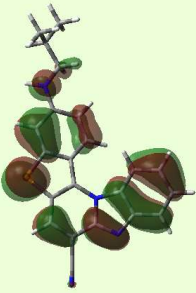  | 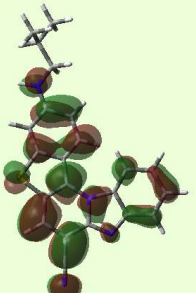  |
| 4<br>$\lambda = 322.68$ nm<br>$f = 0.0379$<br><br>43%  | 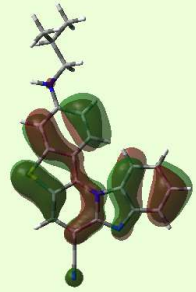 | 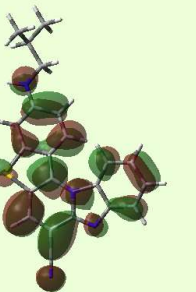 |
|                                                        | 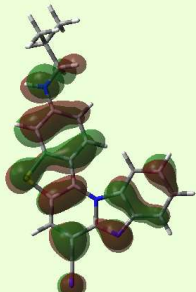 | 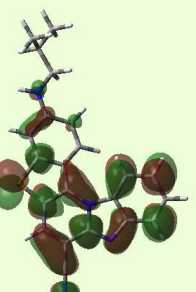 |

**Figure S16.** Natural transition orbitals for the first four excited states of **4**. Transitions are described by their ordinal numbers, absorption wavelengths ( $\lambda$ ), oscillator strengths ( $f$ ), and contributions of the natural transition orbital pairs shown in the table rows.

| Transition                                                                                               | Occupied NTO(s)                                                                     | Unoccupied NTO(s)                                                                    |
|----------------------------------------------------------------------------------------------------------|-------------------------------------------------------------------------------------|--------------------------------------------------------------------------------------|
| 1<br>$\lambda = 490.78 \text{ nm}$<br>$f = 0.6562$<br><br>99%                                            | 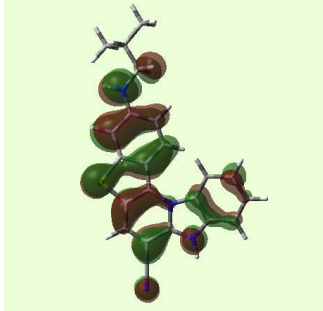   | 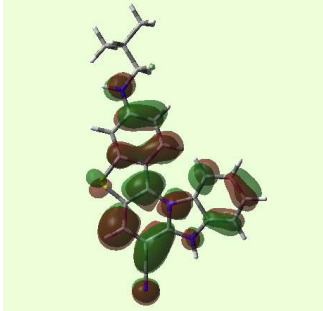   |
| 2<br>$\lambda = 385.46 \text{ nm}$<br>$f = 0.1422$<br><br>97%                                            | 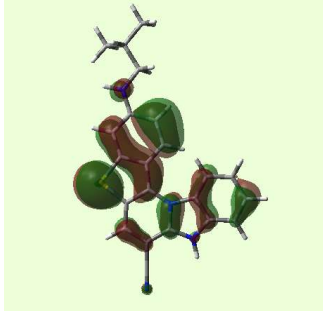   | 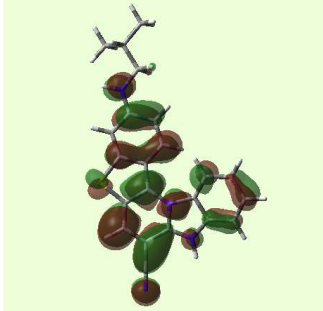   |
| 3<br>$\lambda = 349.57 \text{ nm}$<br>$f = 0.0141$<br><br>37%<br><br><br><br><br><br><br><br><br><br>62% | 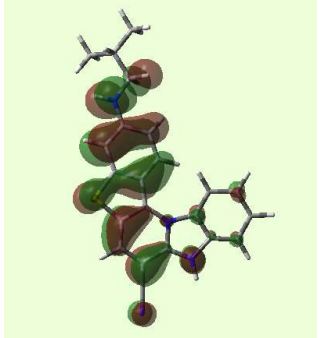  | 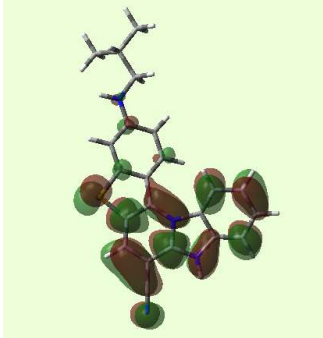  |
|                                                                                                          | 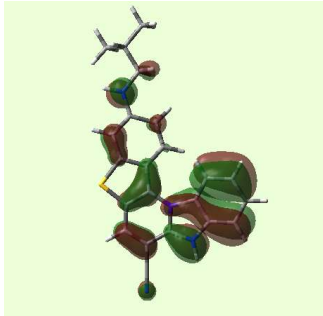 | 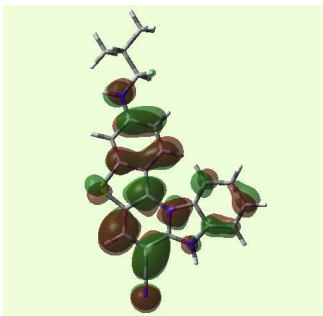 |

|                                                    |                                                                                   |                                                                                    |
|----------------------------------------------------|-----------------------------------------------------------------------------------|------------------------------------------------------------------------------------|
| 4<br>$\lambda = 345.78 \text{ nm}$<br>$f = 0.1271$ | 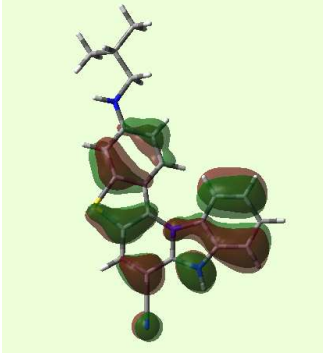 | 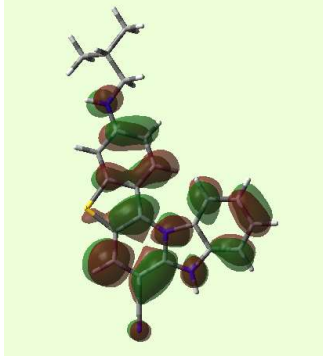 |
| 39%                                                | 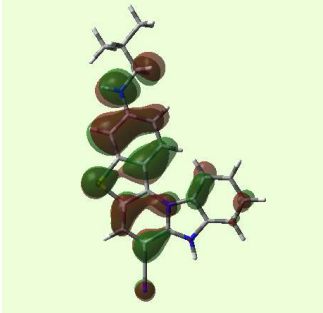 | 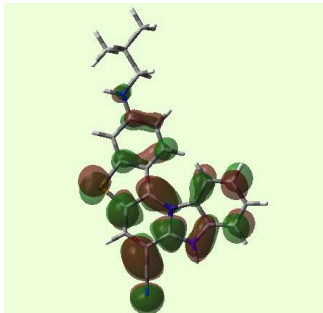 |
| 60%                                                |  |  |

**Figure S17.** Natural transition orbitals for the first four excited states of **4-H<sup>+</sup>(1)**. Transitions are described by their ordinal numbers, absorption wavelengths ( $\lambda$ ), oscillator strengths ( $f$ ), and contributions of the natural transition orbital pairs shown in the table rows.

| Transition                                            | Occupied NTO(s)                                                                     | Unoccupied NTO(s)                                                                    |
|-------------------------------------------------------|-------------------------------------------------------------------------------------|--------------------------------------------------------------------------------------|
| 1<br>$\lambda = 418.85$ nm<br>$f = 0.1423$<br><br>99% | 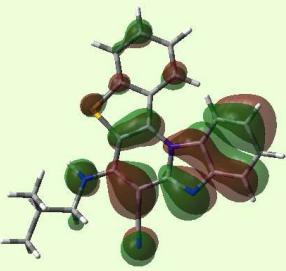   | 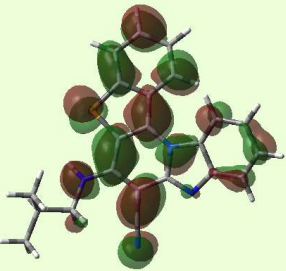   |
| 2<br>$\lambda = 370.03$ nm<br>$f = 0.1860$<br><br>96% | 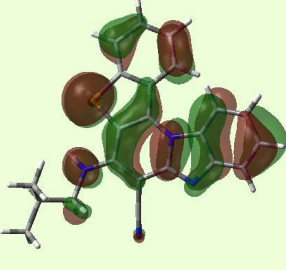   | 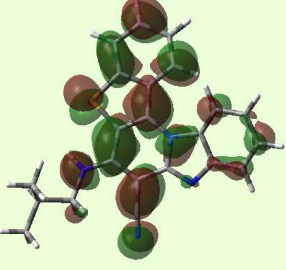   |
| 3<br>$\lambda = 310.34$ nm<br>$f = 0.0226$<br><br>91% | 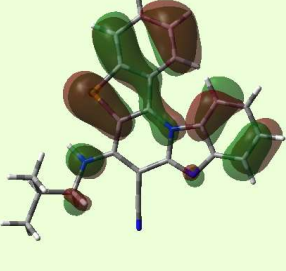  | 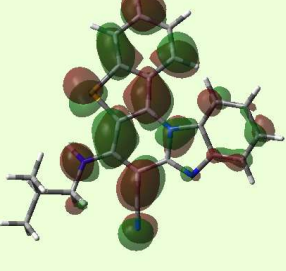  |
| 4<br>$\lambda = 300.81$ nm<br>$f = 0.1993$<br><br>81% | 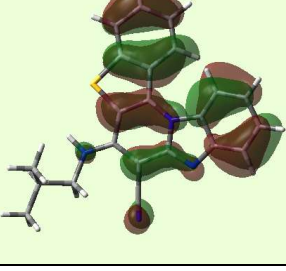 | 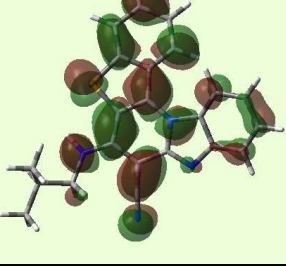 |

**Figure S18.** Natural transition orbitals for the first four excited states of **5**. Transitions are described by their ordinal numbers, absorption wavelengths ( $\lambda$ ), oscillator strengths ( $f$ ), and contributions of the natural transition orbital pairs shown in the table rows.

| Transition                                            | Occupied NTO(s)                                                                     | Unoccupied NTO(s)                                                                    |
|-------------------------------------------------------|-------------------------------------------------------------------------------------|--------------------------------------------------------------------------------------|
| 1<br>$\lambda = 363.69$ nm<br>$f = 0.1773$<br><br>96% | 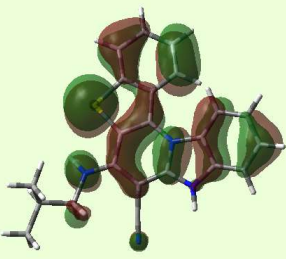   | 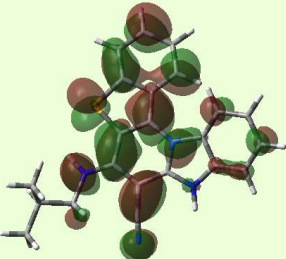   |
| 2<br>$\lambda = 363.13$ nm<br>$f = 0.1930$<br><br>99% | 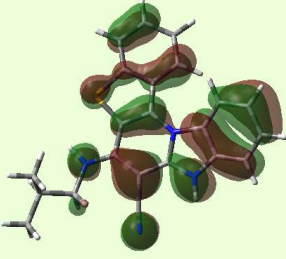   | 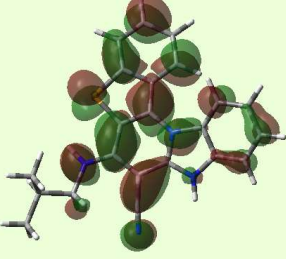   |
| 3<br>$\lambda = 315.66$ nm<br>$f = 0.0957$<br><br>89% | 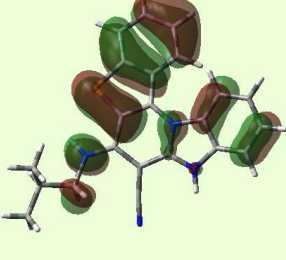  | 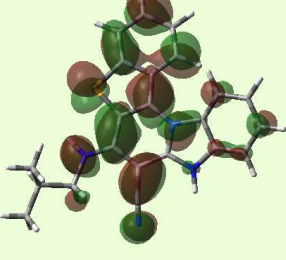  |
| 4<br>$\lambda = 299.89$ nm<br>$f = 0.0835$<br><br>97% | 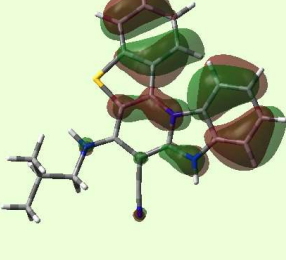 | 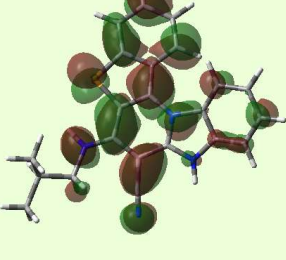 |

**Figure S19.** Natural transition orbitals for the first four excited states of **5-H<sup>+</sup>(1)**. Transitions are described by their ordinal numbers, absorption wavelengths ( $\lambda$ ), oscillator strengths ( $f$ ), and contributions of the natural transition orbital pairs shown in the table rows.

| Transition                                            | Occupied NTO(s)                                                                     | Unoccupied NTO(s)                                                                    |
|-------------------------------------------------------|-------------------------------------------------------------------------------------|--------------------------------------------------------------------------------------|
| 1<br>$\lambda = 429.74$ nm<br>$f = 0.4816$<br><br>99% | 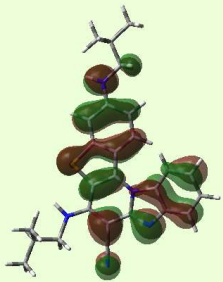   | 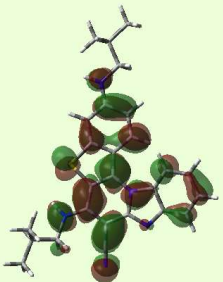   |
| 2<br>$\lambda = 371.78$ nm<br>$f = 0.1824$<br><br>95% | 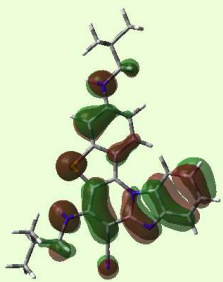   | 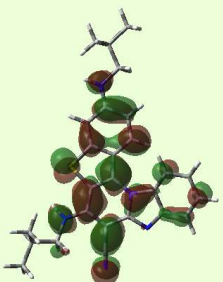   |
| 3<br>$\lambda = 343.96$ nm<br>$f = 0.1514$<br><br>91% | 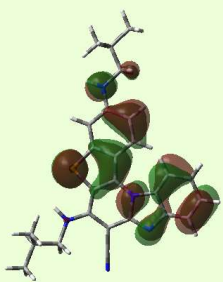  | 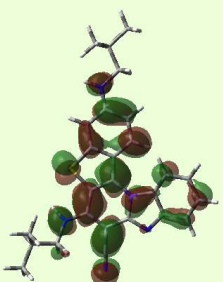  |
| 4<br>$\lambda = 312.06$ nm<br>$f = 0.0265$<br><br>87% | 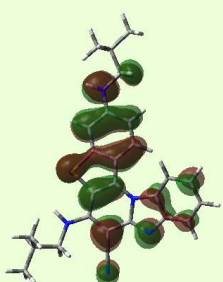 | 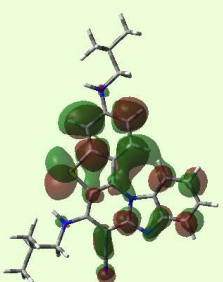 |

**Figure S20.** Natural transition orbitals for the first four excited states of **6**. Transitions are described by their ordinal numbers, absorption wavelengths ( $\lambda$ ), oscillator strengths ( $f$ ), and contributions of the natural transition orbital pairs shown in the table rows.

| Transition                                            | Occupied NTO(s)                                                                     | Unoccupied NTO(s)                                                                    |
|-------------------------------------------------------|-------------------------------------------------------------------------------------|--------------------------------------------------------------------------------------|
| 1<br>$\lambda = 429.94$ nm<br>$f = 0.5997$<br><br>99% | 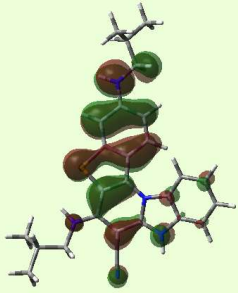   | 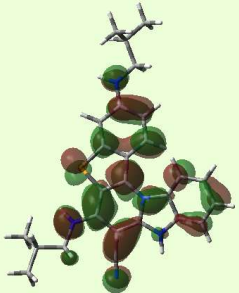   |
| 2<br>$\lambda = 350.41$ nm<br>$f = 0.1715$<br><br>86% | 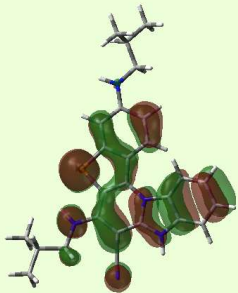   | 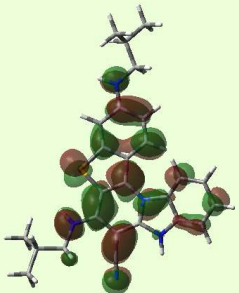   |
| 3<br>$\lambda = 338.05$ nm<br>$f = 0.1324$<br><br>88% | 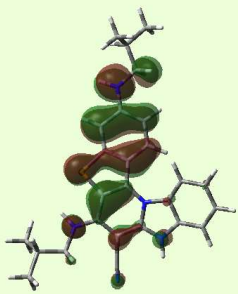  | 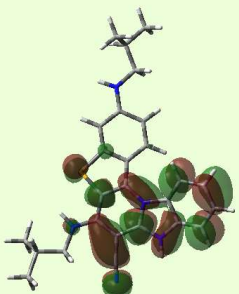  |
| 4<br>$\lambda = 328.91$ nm<br>$f = 0.0442$<br><br>94% | 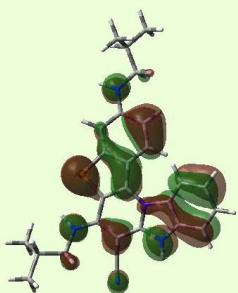 | 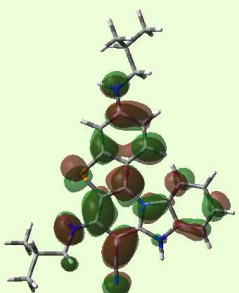 |

**Figure S21.** Natural transition orbitals for the first four excited states of **6-H<sup>+</sup>(1)**. Transitions are described by their ordinal numbers, absorption wavelengths ( $\lambda$ ), oscillator strengths ( $f$ ), and contributions of the natural transition orbital pairs shown in the table rows.

| Transition                                            | Occupied NTO(s)                                                                     | Unoccupied NTO(s)                                                                    |
|-------------------------------------------------------|-------------------------------------------------------------------------------------|--------------------------------------------------------------------------------------|
| 1<br>$\lambda = 374.51$ nm<br>$f = 0.2365$<br><br>99% | 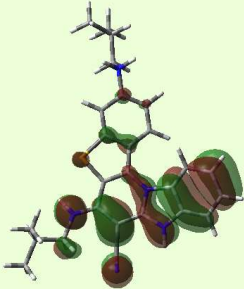   | 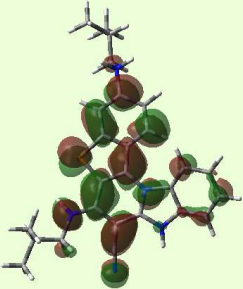   |
| 2<br>$\lambda = 360.26$ nm<br>$f = 0.1247$<br><br>95% | 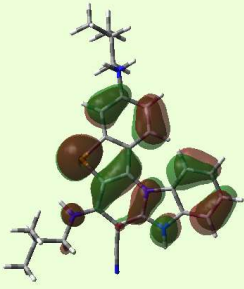   | 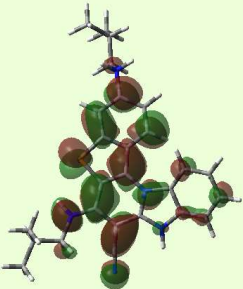   |
| 3<br>$\lambda = 310.47$ nm<br>$f = 0.0403$<br><br>91% | 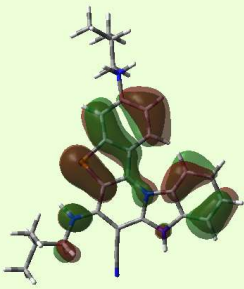  | 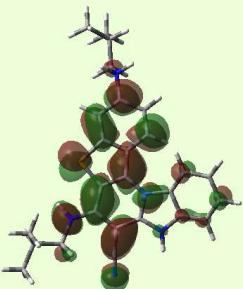  |
| 4<br>$\lambda = 299.96$ nm<br>$f = 0.1519$<br><br>87% | 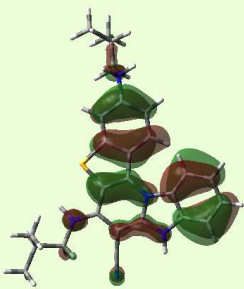 | 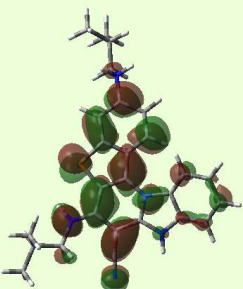 |

**Figure S22.** Natural transition orbitals for the first four excited states of **6-H<sup>++</sup>(1,6)**. Transitions are described by their ordinal numbers, absorption wavelengths ( $\lambda$ ), oscillator strengths ( $f$ ), and contributions of the natural transition orbital pairs shown in the table rows.

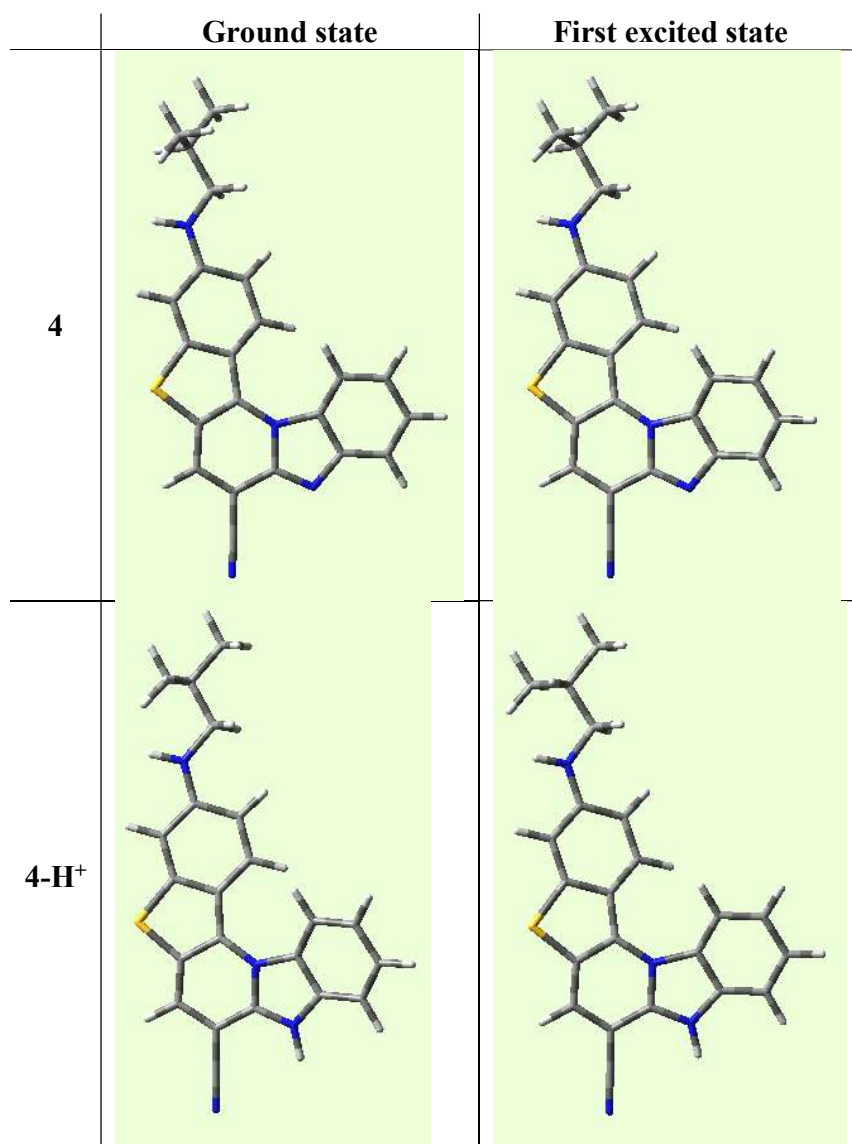

**Figure S23.** Optimized geometries of the neutral and protonated **4** in the ground and in the first excited state

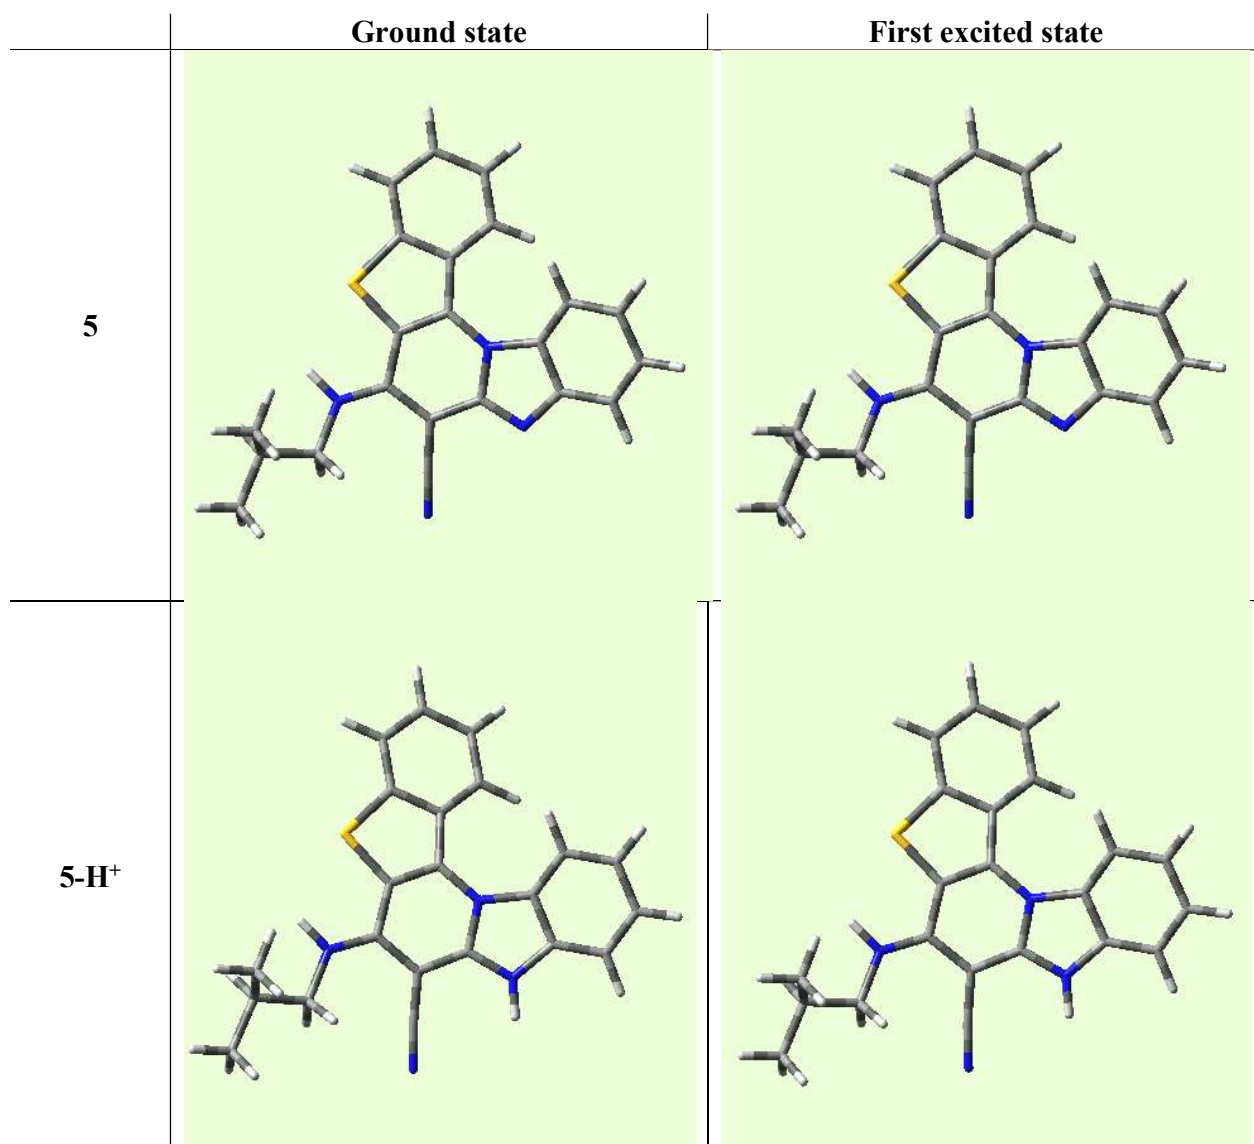

**Figure S24.** Optimized geometries of the neutral and protonated **5** in the ground and in the first excited state

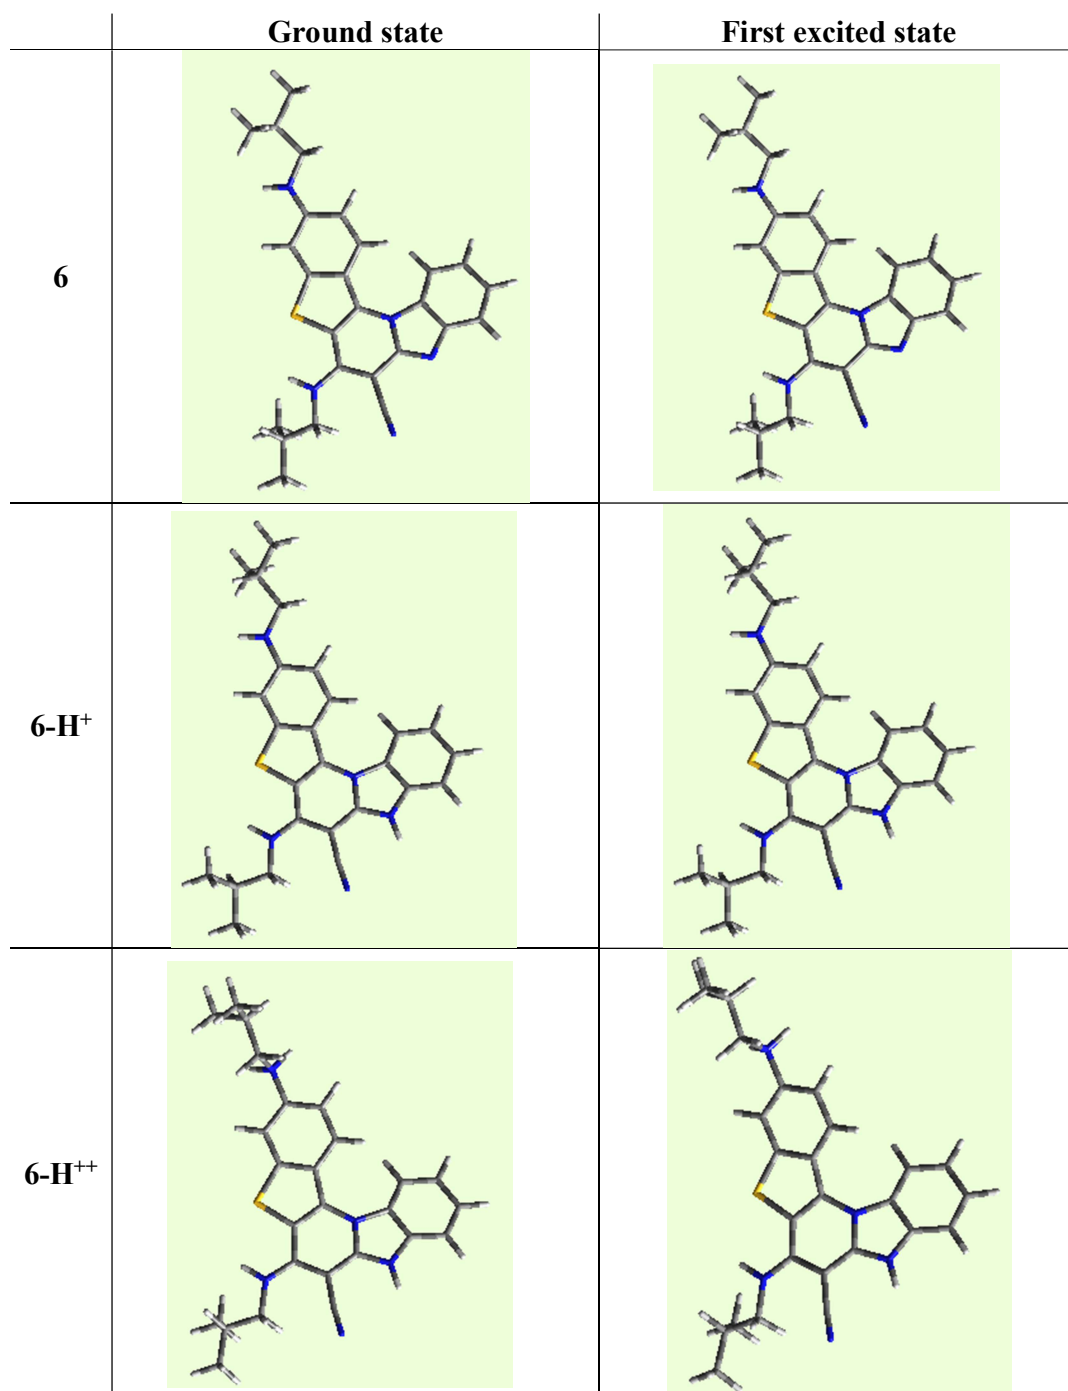

**Figure S25.** Optimized geometries of the neutral, protonated and diprotonated **6** in the ground and in the first excited state
